1 **Profiling of open chromatin in developing pig (*Sus scrofa*) muscle to identify regulatory**  
2 **regions**

3  
4 Mazdak Salavati<sup>1,2</sup>, Shernae A. Woolley<sup>1</sup>, Yennifer Cortés Araya<sup>1</sup>, Michelle M. Halstead<sup>3</sup>,  
5 Claire Stenhouse<sup>1,4</sup>, Martin Johnsson<sup>1,5</sup>, Cheryl J. Ashworth<sup>1</sup>, Alan L. Archibald<sup>1</sup>, Francesc X.  
6 Donadeu<sup>1</sup>, Musa A. Hassan<sup>1,2§</sup> and Emily L. Clark<sup>1,2,§</sup>

7  
8 <sup>1</sup>The Roslin Institute and Royal (Dick) School of Veterinary Studies, The University of  
9 Edinburgh, Edinburgh, UK

10 <sup>2</sup>Centre for Tropical Livestock Genetics and Health (CTLGH), Roslin Institute, University of  
11 Edinburgh, Easter Bush Campus, EH25 9RG, UK

12 <sup>3</sup>Department of Animal Science, University of California, Davis, California, US

13 <sup>4</sup>Department of Animal Science, Texas A&M University, Texas, USA

14 <sup>5</sup>Swedish University of Agricultural Sciences, Uppsala, Sweden

15 <sup>§</sup>Corresponding authors: [emily.clark@roslin.ed.ac.uk](mailto:emily.clark@roslin.ed.ac.uk) ; [musa.hassan@roslin.ed.ac.uk](mailto:musa.hassan@roslin.ed.ac.uk)

16

17 **Abstract**

18

19 There is very little pig-specific information about how the genome is regulated in  
20 domestic pigs (*Sus scrofa*). This lack of knowledge hinders efforts to define and predict the  
21 effects of genetic variants in pig breeding programmes. In order to address this knowledge  
22 gap, we need to identify regulatory sequences in the pig genome starting with regions of open  
23 chromatin. We have optimised the ‘Improved Protocol for the Assay for Transposase-  
24 Accessible Chromatin (Omni-ATAC-Seq)’ to profile regions of open chromatin in flash frozen  
25 pig muscle tissue samples. This protocol has allowed us to identify putative regulatory regions  
26 in semitendinosus muscle from 24 male piglets. We collected samples from the smallest,  
27 average, and largest sized male piglets from each litter through five developmental time points.  
28 The ATAC-Seq data were mapped to Sscrofa11.1 using Bowtie2 and Genrich was used for  
29 post-alignment peak-calling. Of the 4,661 ATAC-Seq peaks identified that represent regions  
30 of open chromatin, >50% were within 1 kb of known transcription start sites. Differential read  
31 count analysis revealed 377 ATAC-Seq defined genomic regions where chromatin  
32 accessibility differed significantly across developmental time points. In parallel we measured  
33 genome-wide gene expression and allele-specific expression using RNA-Seq analysis of the  
34 same muscle samples. We found regions of open chromatin associated with down regulation  
35 of genes involved in muscle development that were present in small sized foetal piglets but  
36 absent in large foetal piglets at day 90 of gestation. The dataset that we have generated  
37 provides: i) a resource for studies of genome regulation in pigs, and ii) contributes valuable

38 functional annotation information to filter genetic variants for use in genomic selection in pig  
39 breeding programmes. Future work could leverage the ATAC-Seq data with very large  
40 datasets of genetic variants from phenotyped pigs. This approach could inform chromatin  
41 aware genomic prediction models and determine whether regions of open chromatin are  
42 enriched for trait-linked variants, and especially for muscle and meat traits.

43

44 Key words: ATAC-Seq, Sscrofa11.1, RNA-Seq, frozen tissue, muscle, allele-specific  
45 expression

46

## 47 **Introduction**

48 The domestic pig (*Sus scrofa*) is a hugely important farmed animal species globally,  
49 contributing a source of healthy animal protein to feed the growing human population. Meeting  
50 the increased demand for healthy sustainably produced food from pigs in coming decades will  
51 require novel breeding strategies and management practices that will rely on an improved  
52 ability to predict phenotype from genotype (Clark et al., 2020). High resolution annotations of  
53 the expressed and regulatory regions of farmed animal genomes provides a resource to  
54 accurately link genotype to phenotype (Andersson et al., 2015). Variants in putative regulatory  
55 regions have been associated with >100 phenotypes in humans (Pai et al., 2015). Recently,  
56 a functional regulatory variant in the gene myosin heavy chain 3 (*MYH3*) was shown to  
57 influence muscle fibre type composition in Korean native pigs (Cho et al., 2019). There is very  
58 little species-specific information about how the genome is regulated in domestic pigs. This  
59 lack of knowledge hinders efforts to identify causative variants for complex traits, and a better  
60 knowledge of genome regulation might also improve genomic prediction in breeding  
61 programmes. In order to address this knowledge gap, we aim to identify regulatory sequences  
62 in the pig genome, starting with regions of open chromatin.

63 Activation of regulatory DNA drives gene expression patterns that influence the  
64 phenotypic characteristics. Measurement of open chromatin gives a quantitative genome wide  
65 profile of chromatin accessibility appearing as ‘peaks’ in the data generated for each tissue  
66 sample (Thurman et al., 2012). These peaks can reflect the function of the adjoining regulatory  
67 DNA (Thurman et al., 2012). The Assay for Transposable Chromatin (ATAC-Seq) (Buenrostro  
68 et al., 2013, 2015) has been used successfully to profile regions of open chromatin in chicken,  
69 cattle and pig genomes (Halstead et al., 2020a, 2020b). In this study we optimised the  
70 ‘Improved Protocol for the Assay for Transposase-Accessible Chromatin (Omni-ATAC-Seq)’  
71 (Corces et al., 2017) to profile regions of open chromatin in flash frozen pig muscle tissue  
72 samples.

73 Muscle is an important tissue in commercial pig production as muscle traits (e.g. meat  
74 and carcass quality) act as economic drivers in pig breeding programmes. Prior to this study

75 knowledge of open chromatin in pig muscle was limited to data from only two adult animals  
76 (Halstead et al., 2020b) and four embryos from three early developmental stages (Yue et al.,  
77 2021). For this study, we collected semitendinosus muscle tissues from piglets at five different  
78 stages of development (three foetal stages, one neonatal and one juvenile stage). The  
79 developmental stages were chosen according to their relevance to hyperplasic muscle  
80 development in the foetus and post-natal muscle hypertrophy (Ashmore et al., 1973; Wigmore  
81 and Stickland, 1983; Rudar et al., 2019). We hypothesised that gene expression and  
82 regulation in semitendinosus muscle tissue would change as the piglets aged, allowing us to  
83 identify the transcripts and regions of open chromatin that drive myogenesis. Several studies  
84 have profiled gene expression during foetal development in pigs (Zhao et al., 2011, 2015;  
85 Yang et al., 2015; Ayuso et al., 2016), however to date only one other study has examined  
86 how chromatin openness changes as the piglet develops (Yue et al., 2021).

87 The number of muscle fibres in pigs is proportional to weight at birth (Aiello et al., 2018;  
88 Stange et al., 2020). Low birth weight in pigs has been shown to cause lifelong impairments  
89 in muscle development and growth (Rehfeldt and Kuhn, 2006). Low birth weight piglets often  
90 display 'catch up' growth, but at the expense of laying down a higher proportion of body fat  
91 compared to normal sized littermates (Estany et al., 2017). Consistent with these  
92 observations, mesenchymal stem cells from intrauterine growth-restricted piglets show a  
93 differentiation bias towards the adipocyte lineage in comparison with their normal sized litter  
94 mates (Weatherall et al., 2020). Low birth weight piglets tend to produce fattier, less valuable  
95 carcasses from a production perspective and as such their incidence within pig litters should  
96 be kept to a minimum (Pardo et al., 2013). Piglet size variation within a litter is likely to be  
97 determined by many different physiological variables including variation in placental blood flow  
98 (Stenhouse et al., 2018) but may also be influenced by genetic and epigenetic factors (Wang  
99 et al., 2016; Li et al., 2020).

100 The study we present here used samples of muscle tissue from a common commercial  
101 breed cross (Large White x Landrace) to generate ATAC-Seq and RNA-Seq data from the  
102 same individuals to characterise the expressed and regulatory regions of the genome during  
103 pig development. The aims of the study were to: 1) Optimise the Omni-ATAC-Seq protocol for  
104 frozen pig muscle tissue; 2) Map regions of open chromatin in semitendinosus muscle tissue  
105 from small, average and large sized male piglets at five developmental stages (days 45, 60 &  
106 90 pre-natal, one and six weeks post-natal) and 3) Analyse RNA-Seq data from the same  
107 tissues to generate gene and allele-specific expression profiles. To our knowledge, this is the  
108 first time the Omni-ATAC-Seq protocol has been optimised for frozen muscle tissue from a  
109 farmed animal species and we have provided a detailed protocol on the Functional Annotation  
110 of Animal Genomes (FAANG) data portal (<https://data.faang.org>). The outcomes of the study  
111 will help to 1) Understand the molecular drivers of muscle growth in pigs; 2) Provide a

112 foundation for functionally validating target genomic regions *in vitro* and 3) Identify high quality  
113 causative variants for muscle growth with the goal of harnessing genetic variation and turning  
114 it into sustainable genetic gain in pig breeding programmes.

115

## 116 **Methods**

117

### 118 **Animals**

119 Tissue samples for this study were collected from Large White x Landrace pigs that  
120 were euthanized, not specifically for this study but for other on-going projects on the effects of  
121 foetal size on pig development at The Roslin Institute. Foetal tissues were collected from  
122 pregnant sows that were euthanized with sodium pentobarbitone 20% w/v (Henry Schein  
123 Animal Health, Dumfries, UK) at a dose of 0.4 ml/kg by intravenous injection. Post-natal  
124 samples were collected after euthanasia by captive bolt.

125

### 126 **Sample collection of frozen muscle tissue samples for ATAC-Seq and RNA-Seq**

127 The tissue samples used for this study were from archived material (with the exception  
128 of the piglets that were six weeks of age) collected from the largest, smallest and average  
129 sized male piglets per litter at five different developmental stages (Table 1). The largest,  
130 smallest and average sized piglets from each litter were selected according to body weight for  
131 the foetal time points and birth weight for post-natal time points (Supplementary Table 1).  
132 Developmental stages were chosen, according to previous studies (Ashmore et al., 1973;  
133 Wigmore and Stickland, 1983; Rudar et al., 2019) as follows:

134

135 Day 45 of gestation - when primary muscle fibres form.

136 Day 60 of gestation - when secondary muscle fibres begin to form.

137 Day 90 of gestation - when fibre formation ceases after which subsequent muscle growth  
138 occurs through fibre hypertrophy.

139 One week of age - during active muscle hypertrophy.

140 Six weeks of age – once muscle hypertrophy has levelled off.

141

142 Due to limited sample availability the experimental design is unbalanced (Table 1),  
143 specifically for days 45 (n=3) and 60 (n=3) of gestation, and six weeks of age (n=5), only one  
144 complete set of littermates (smallest, average and largest) was included in the analysis. At  
145 day 90 (n=11) of gestation three complete litters and one incomplete litter were included, while  
146 at one week of age samples were only available from the smallest and largest piglets from  
147 one litter (n=2). We have included a flow chart describing which samples were analysed at  
148 each stage of this study (Figure 1).

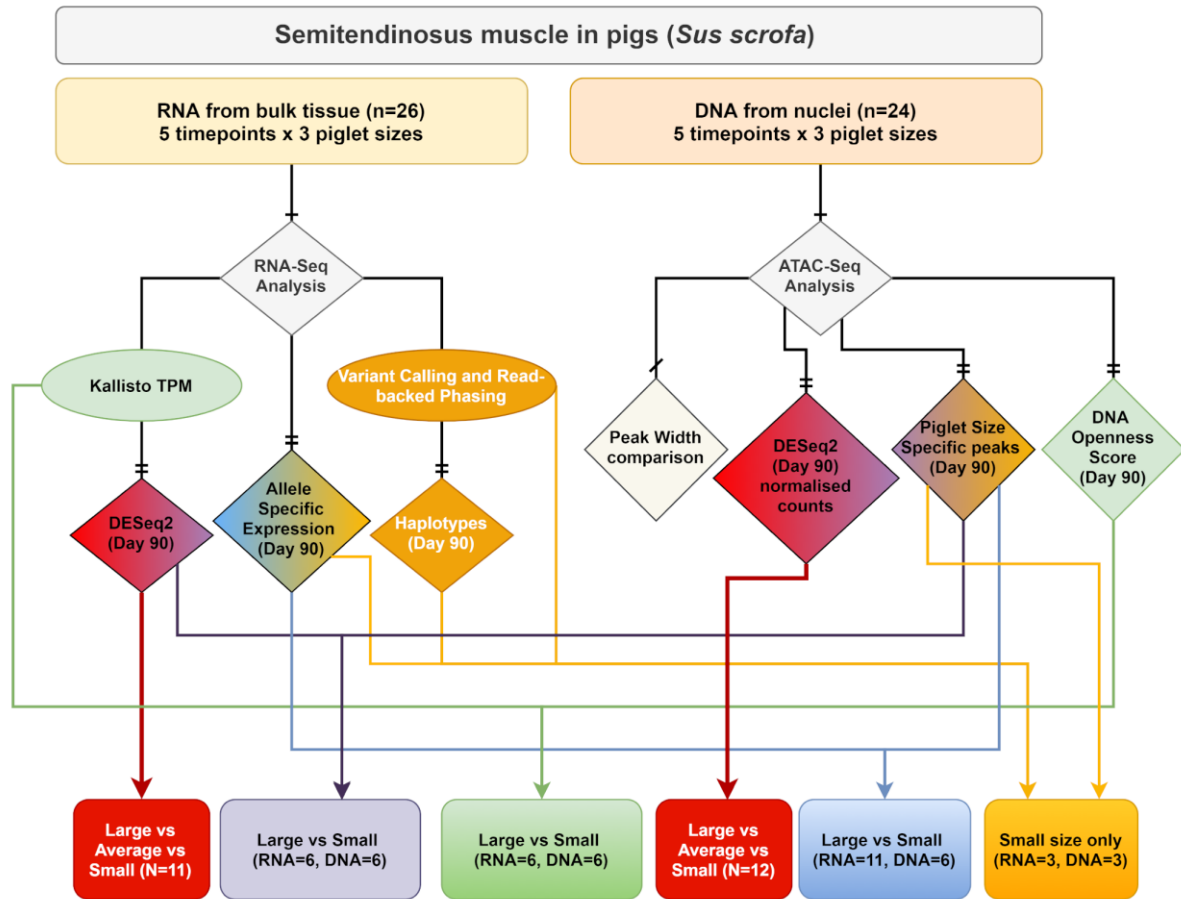

149

150 *Figure 1: Flowchart describing the experimental design and samples included in each stage*  
 151 *of the analysis performed in this study. Colour coding indicates where there are overlaps in*  
 152 *the analysis performed for each component of the study.*

153

154 Samples were collected from the semitendinosus muscle from the hind leg of piglets from  
 155 each developmental stage (Table 1). The only exception was day 45, when whole muscle  
 156 tissue was collected, because it was not possible to differentiate specific muscle types at this  
 157 early stage of development. Each sample was flash frozen in liquid nitrogen, as quickly as  
 158 possible within an hour post euthanasia and stored at -80°C for future analysis. From the six  
 159 week old piglets additional samples were collected in sucrose buffer to isolate and  
 160 cryopreserve nuclei according to the method described in (Halstead et al., 2020a).  
 161 Cryopreserving isolated nuclei for a small number of samples would allow us to validate the  
 162 data we generated from the flash frozen material, which we were optimising for the first time  
 163 on muscle tissue. The protocol for collection of tissue samples at the farm is available via the  
 164 FAANG Data Coordination Centre

165 [https://data.faaug.org/api/fire\\_api/samples/ROSLIN\\_SOP\\_Collection\\_of\\_tissue\\_samples\\_for](https://data.faaug.org/api/fire_api/samples/ROSLIN_SOP_Collection_of_tissue_samples_for)  
166 [ATAC-Seq\\_and\\_RNA-Seq\\_from\\_large\\_animals\\_20200618.pdf.](#)  
167

168 *Table 1. Details of muscle tissues sampled, for ATAC-Seq and RNA-Seq, from piglets at five*  
 169 *developmental stages.*

| Sample ID                                | Litter Identifier | Gestational Age in Days | Tissue Sampled        | Piglet Size | ATAC-Seq | RNA-Seq |
|------------------------------------------|-------------------|-------------------------|-----------------------|-------------|----------|---------|
| <b>Pre-natal time points</b>             |                   |                         |                       |             |          |         |
| D45L220716                               | 220716            | 45                      | Hind Leg Muscle       | Largest     | Yes      | Yes     |
| D45N220716                               | 220716            | 45                      | Hind Leg Muscle       | Average     | Yes      | Yes     |
| D45S220716                               | 220716            | 45                      | Hind Leg Muscle       | Smallest    | Yes      | Yes     |
| D60L120916                               | 120916            | 60                      | Semitendinosus Muscle | Largest     | Yes      | Yes     |
| D60N120916                               | 120916            | 60                      | Semitendinosus Muscle | Average     | Yes      | Yes     |
| D60S120916                               | 120916            | 60                      | Semitendinosus Muscle | Smallest    | Yes      | No      |
| D60S23976                                | 23976             | 60                      | Semitendinosus Muscle | Smallest    | No       | Yes     |
| D90L251016                               | 251016            | 90                      | Semitendinosus Muscle | Largest     | Yes      | Yes     |
| D90L111016                               | 111016            | 90                      | Semitendinosus Muscle | Largest     | Yes      | Yes     |
| D90L121016                               | 121016            | 90                      | Semitendinosus Muscle | Largest     | Yes      | Yes     |
| D90N251016                               | 251016            | 90                      | Semitendinosus Muscle | Average     | Yes      | Yes     |
| D90N111016                               | 111016            | 90                      | Semitendinosus Muscle | Average     | Yes      | Yes     |
| D90N031115                               | 031115            | 90                      | Semitendinosus Muscle | Average     | Yes      | Yes     |
| D90N121016                               | 121016            | 90                      | Semitendinosus Muscle | Average     | Yes      | Yes     |
| D90N231115                               | 231115            | 90                      | Semitendinosus Muscle | Average     | Yes      | Yes     |
| D90S231115                               | 231115            | 90                      | Semitendinosus Muscle | Smallest    | Yes      | Yes     |
| D90S251016                               | 251016            | 90                      | Semitendinosus Muscle | Smallest    | Yes      | Yes     |
| D90S111016                               | 111016            | 90                      | Semitendinosus Muscle | Smallest    | Yes      | Yes     |
| D90S121016                               | 121016            | 90                      | Semitendinosus Muscle | Smallest    | Yes      | No      |
| <b>Post-natal time points</b>            |                   |                         |                       |             |          |         |
|                                          |                   | <b>Age in weeks</b>     |                       |             |          |         |
| 1WKL100918                               | 100918            | One                     | Semitendinosus Muscle | Largest     | Yes      | Yes     |
| 1WKS100918                               | 100918            | One                     | Semitendinosus Muscle | Smallest    | Yes      | Yes     |
| 6WKA050219                               | 050219            | Six                     | Semitendinosus Muscle | Average     | Yes      | Yes     |
| 6WKS050219                               | 050219            | Six                     | Semitendinosus Muscle | Smallest    | Yes      | Yes     |
| 6WKS131218                               | 131218            | Six                     | Semitendinosus Muscle | Smallest    | No       | Yes     |
| 6WKA131218                               | 131218            | Six                     | Semitendinosus Muscle | Average     | No       | Yes     |
| 6WKL131218                               | 131218            | Six                     | Semitendinosus Muscle | Largest     | No       | Yes     |
| <b>Cryopreserved Nuclei Preparations</b> |                   |                         |                       |             |          |         |
|                                          |                   | <b>Age in weeks</b>     |                       |             |          |         |
| 6WKA050219CN                             | 050219            | Six weeks               | Semitendinosus Muscle | Average     | Yes      | No      |
| 6WKS050219CN                             | 050219            | Six weeks               | Semitendinosus Muscle | Smallest    | Yes      | No      |

171 **Isolation of cryopreserved nuclei from fresh muscle tissue and preparation of**  
172 **tagmented nuclear DNA**

173 We used the protocol described in (Halstead et al., 2020a) to isolate and cryopreserve  
174 intact nuclei from fresh muscle tissue samples from the six week old piglets (Table 1). Briefly,  
175 each tissue sample was transferred to a GentleMACS C tube (Mitenyi Biotec, Germany) with  
176 sucrose buffer and homogenised. The homogenate was then filtered and Dimethyl Sulfoxide  
177 (DMSO) (Sigma Aldrich, USA) added (10% final concentration), before freezing at -80°C  
178 overnight in a Mr Frosty (Nalgene, USA), then transferring to a -80°C freezer for long-term  
179 storage. The full protocol for preparation of cryopreserved nuclei from fresh muscle tissue is  
180 available via the FAANG Data Coordination Centre  
181 [https://data.faang.org/api/fire\\_api/samples/ROSLIN\\_SOP\\_Cryopreservation\\_of\\_Nuclei\\_for](https://data.faang.org/api/fire_api/samples/ROSLIN_SOP_Cryopreservation_of_Nuclei_for_ATACSeq_using_GentleMACS_20201119.pdf)  
182 [ATACSeq\\_using\\_GentleMACS\\_20201119.pdf](https://data.faang.org/api/fire_api/samples/ROSLIN_SOP_Cryopreservation_of_Nuclei_for_ATACSeq_using_GentleMACS_20201119.pdf).

183 To prepare tagmented DNA the cryopreserved nuclei preparations were thawed slowly  
184 at room temperature by adding 500 µl of cold 1x Phosphate Buffered Saline (PBS), filtered  
185 then centrifuged at 500 x g at 4°C in a swinging bucket centrifuge for 10 minutes. After  
186 centrifugation, the pellet was resuspended in 1 ml cold ATAC-Seq RSB buffer +  
187 0.1% Tween20 (Sigma Aldrich, USA) for lysis and centrifuged for 10 minutes at 500 x g at  
188 4°C. The pellet of nuclei was then washed in PBS and resuspended in 50 µl transposition mix  
189 (25 µl TD buffer, 2.5 µl TDE1 enzyme, Molecular Biology Grade Sterile H<sub>2</sub>O) from the Nextera  
190 DNA Sample Prep Kit (Illumina, USA). The pellet was incubated with the transposition mix for  
191 60 minutes at 37°C at 300 rpm on a thermomixer. The pellet of transposed nuclear DNA, was  
192 purified with a MinElute PCR purification kit (Qiagen, Germany), eluted in 15 µl of Buffer EB,  
193 and stored at -20°C. The full protocol is available via the FAANG Data Coordination Centre  
194 [https://data.faang.org/api/fire\\_api/samples/ROSLIN\\_SOP\\_ATAC-Seq\\_DNAIsolationandTag](https://data.faang.org/api/fire_api/samples/ROSLIN_SOP_ATAC-Seq_DNAIsolationandTag)  
195 [mentation\\_Cryopreserved\\_Muscle\\_Nuclei\\_Preparations\\_20200720.pdf](https://data.faang.org/api/fire_api/samples/ROSLIN_SOP_ATAC-Seq_DNAIsolationandTag)

196

197 **Isolation of nuclei from frozen muscle tissue and preparation of tagmented nuclear DNA**

198 ATAC-Seq libraries were prepared using a version of the 'Improved Protocol for the  
199 Assay for Transposase-Accessible Chromatin (Omni-ATAC-Seq)' (Corces et al., 2017) which  
200 we optimised for flash frozen pig muscle tissue samples for this study. The main modification  
201 that we introduced to the protocol was an initial dissociation step using a GentleMACS  
202 Dissociator (Mitenyi Biotec, Germany), essentially combining the Omni-ATAC-Seq protocol  
203 with the initial steps from (Halstead et al., 2020a). The protocol is described in full at  
204 [https://data.faang.org/api/fire\\_api/samples/ROSLIN\\_SOP\\_ATAC\\_Seq\\_DNAIsolationandTag](https://data.faang.org/api/fire_api/samples/ROSLIN_SOP_ATAC_Seq_DNAIsolationandTag)  
205 [mentation\\_Frozen\\_Muscle\\_Tissue\\_20200720.pdf](https://data.faang.org/api/fire_api/samples/ROSLIN_SOP_ATAC_Seq_DNAIsolationandTag) and summarised here. The components of  
206 each of the buffers are included in Supplementary Table 2. Each flash frozen tissue sample  
207 (~200 mg per sample) was chopped into small pieces over dry ice and then dissociated in a



208 GentleMACS C-tube (Mitenyi Biotec, Germany) in 1 ml of 1XHB buffer (+Protease Inhibitor  
209 Cocktail (PIC)). The samples were dissociated using programme m\_muscle\_0.1\_0.1  
210 (equivalent to 'E0.1c Tube') twice on a GentleMACS Dissociator (Mitenyi Biotec, Germany).  
211 Immediately after dissociation the samples were filtered through a 70 µm corning cell strainer  
212 (Sigma Aldrich, USA) then centrifuged at 3000 x g for 5 minutes. The pellet was resuspended  
213 in 400 µl 1XHB buffer and transferred to a 2 ml Eppendorf Protein Lo-Bind tube (Eppendorf,  
214 UK). 400 µl of 50% Iodixanol solution (Opti-Prep Density Gradient Medium) (SLS, UK) was  
215 added to the 400 µl of cell solution (final 25% Iodixanol). An Iodixanol gradient was then  
216 created and samples transferred to a swinging bucket centrifuge and spun for 25 minutes at  
217 maximum speed at 4°C with no brake. A thin "whitish" band appeared between layers two and  
218 three of the gradient. Evaluation and counting of nuclei was performed by staining with Trypan  
219 Blue (ThermoFisher Scientific, USA). 1 ml of ATAC-RSB Buffer + 0.1% Tween20 (Sigma  
220 Aldrich, USA) was then added to lyse the nuclei and the sample centrifuged for 10 minutes at  
221 500 x g at 4°C. The pellet was then gently resuspended in 50 µl transposition mix for  
222 tagmentation as described for cryopreserved nuclei samples above.

223

#### 224 **ATAC-Seq library preparation**

225 The library preparation protocol, adapted from (Corces et al., 2017), was used for the  
226 flash frozen tissues and the cryopreserved nuclei preparations. The protocol described in full  
227 is available via the FAANG Data Coordination Centre  
228 [https://data.faang.org/api/fire\\_api/samples/ROSLIN\\_SOP\\_ATAC-Seq\\_LibraryPreparationand](https://data.faang.org/api/fire_api/samples/ROSLIN_SOP_ATAC-Seq_LibraryPreparationandSizeSelection_20200720.pdf)  
229 [dSizeSelection\\_20200720.pdf](https://data.faang.org/api/fire_api/samples/ROSLIN_SOP_ATAC-Seq_LibraryPreparationandSizeSelection_20200720.pdf). A PCR reaction mix was set up comprising 10 µl molecular  
230 biology grade H<sub>2</sub>O, 2.5 µl Ad1 primer 25 µM, 2.5 µl Ad2.x primer 25 µM (variable index see  
231 Supplementary Table 3), and 25 µl 2x NEBNext Hi-Fi PCR mix (NEB, USA) per reaction. 10 µl  
232 of transposed DNA was added to each reaction and 5 amplification cycles of the following  
233 PCR reaction performed: 72°C for 5 min, 98°C for 30 sec, 98°C for 10 sec, 63°C for 30 sec,  
234 72°C for 1 min. The GreenLeaf Quantitative PCR (qPCR) Protocol (Buenrostro et al., 2015)  
235 was used to determine the number of additional PCR amplification cycles that were required  
236 for each sample, to stop amplification prior to saturation and avoid variation across samples  
237 caused by PCR bias. Samples for which more than 5-7 additional cycles were required were  
238 discarded due to the high probability of PCR bias caused by additional cycles. Amplified  
239 ATAC-Seq libraries were then purified with a MinElute PCR purification kit (Qiagen, Germany).  
240 Library quality was checked on the Agilent 2200 TapeStation System (Agilent Genomics,  
241 USA). Libraries were assessed for quality according to an even distribution of fragments and  
242 a clearly differentiated sub-nucleosomal fragment as described in (Halstead et al., 2020a). If  
243 library quality was sufficient the sub-nucleosomal fragment (150-250 bp) was size selected, in  
244 order to minimise the signal to noise ratio, as suggested in (Halstead et al., 2020a). Size

245 selection was performed using a Thermo Scientific E-Gel System (ThermoFisher Scientific,  
246 USA). To check the size of the selected fragment an aliquot was run on the Agilent 2200  
247 TapeStation System (Agilent Genomics, USA). After size selection the libraries were pooled  
248 and stored at -20°C prior to sequencing.

249

### 250 **Sequencing of ATAC-Seq libraries**

251 Pooled libraries (4 batches) were sequenced to generate 50 nt paired-end reads on  
252 an Illumina NovaSeq 6000 platform using a single S2 flow cell. All of the libraries generated  
253 >90M paired-end reads (Min: 9.8e+07, Max: 3.5e+08, Median: 1.97e+08).

254

### 255 **ATAC-Seq data processing and mapping**

256 Quality control of the raw sequence data was performed using FastQC v0.11.9 and  
257 multiQC v1.9 (Ewels et al., 2016). Quality control metrics included the rate of PCR duplication.  
258 The paired end reads were trimmed using Trimmomatic v0.39 (Bolger et al., 2014). The  
259 trimmed reads were then mapped to the Sscrofa11.1 pig reference genome (Warr et al., 2020)  
260 available from Ensembl (GCA\_000003025.6) using Bowtie2 v2.3.5.1 and the default flags of  
261 the *--very-sensitive* mode followed by excluding unmapped reads and marking PCR  
262 duplicates. The BAM files that were generated were then sorted and indexed using samtools  
263 v1.6 (Li, 2011). Overall on average more than 75 M reads per samples were uniquely mapped  
264 (Min: 2.47e+07 ,Max: 1.28e+08, Median: 7.74e+07, Mean  $\pm$  SD: 7.72e+07  $\pm$  3.15e+07). The  
265 PCR duplication level was 43%  $\pm$  8 (mean  $\pm$  SD) on average across all libraries.

266

### 267 **ATAC-Seq peak calling using Genrich**

268 ATAC-Seq peak calling for each developmental time point was performed using  
269 Genrich v0.5 (John M. Gaspar, 2020) under ATAC-Seq mode. Two rounds of peak calling  
270 were performed as follows: 1) peak calling on individual samples (n=24), 2) aggregated multi-  
271 sample peak calling for each time point. A set of peaks that were shared across the five  
272 developmental time points was produced using bedtools v2.26.0 (Quinlan and Hall, 2010)  
273 using the intersect functionality series of scripts. All the scripts used for this analysis can be  
274 found in Supplementary File 1 and the code repository  
275 [https://msalavat@bitbucket.org/msalavat/pig\\_muscle.git](https://msalavat@bitbucket.org/msalavat/pig_muscle.git). Briefly, a merger of all peaks that  
276 were present in at least one time point was performed to create a set of peaks that were  
277 shared across all time points. Then, peaks that were specific to each time point were  
278 subtracted from the merger. The BED files of peaks specific to each developmental time point  
279 are available in Supplementary File 1.

280 For the day 90 samples only, we re-analysed the ATAC-Seq peaks in the three sizes  
281 of foetal piglet per litter (large, average and small). Peak calling was performed using the same

282 Genrich flags as previously described, and we separated peaks shared between all size  
283 classes and size class specific peaks with bedtools. The size specific peaks generated for the  
284 foetal piglets at day 90 of gestation and the scripts used to produce them can also be found  
285 in Supplementary File 1 and the code repository  
286 [https://msalavat@bitbucket.org/msalavat/pig\\_muscle.git](https://msalavat@bitbucket.org/msalavat/pig_muscle.git).

287

### 288 **Differential peak analysis based on read counts**

289 A consensus set of ATAC-Seq peaks across all 24 samples was created for the  
290 purpose of differential peak analysis. A read fragment filtering and analysis workflow was  
291 devised similar to a recently published framework by (Yan et al., 2020). Briefly, the mapped  
292 BAM files were filtered for high mapping quality, non-PCR duplicates and non-mitochondrial  
293 reads using samtools v1.6 (`samtools view -h -f2 -q10 -F1548 -bS`). A consensus set of  
294 ATAC-Seq peaks, from individual sets that were called in all 24 samples, was created using  
295 bedtools v2.26.0 (`bedtools merge -i all_samples.bed -d10 -c 4,7,10,4 -o`  
296 `count_distinct,mean,mode,distinct`). Peaks that were within  $\leq 10$  nucleotides of another peak  
297 were merged in to one peak, and a support value (i.e. the number of tissue samples in which  
298 the peak was present) was calculated for each peak. Peaks with a support value of less than  
299 3 (i.e. they were present in less than 3 tissue samples) were removed, resulting in a total of  
300 12,090 ATAC-Seq peaks, which will now be referred to as the “consensus set”. A read count  
301 for each sample (using high quality BAM files) was then generated using ht-seq v0.13.5  
302 (Anders et al., 2015) against the consensus set of ATAC-Seq peaks (`htseq-count --`  
303 `stranded=no -type=region`). The library size for each BAM file was then used to normalised  
304 the read counts for downstream analysis as described by (Yan et al., 2020) using the following  
305 equation:

$$306 \text{ Normalised counts} = \log_2\left(\left(\frac{\text{raw counts}}{\text{library size}} * 1.0 + E08\right) + 1\right)$$

307 DESeq2 v1.30.1 (Love et al., 2014) was used for differential peak analysis to compare across  
308 developmental time points and piglet sizes at day 90 . A Likelihood Ratio Test (reduced model)  
309 was used for the analysis of the time points (design:  $\sim$  size + time ; reduced:  $\sim$  size). A Wald  
310 test linear model was used for day 90 differential peak analysis (design =  $\sim$  litter + library size  
311 + piglet size). In both analyses a multiple testing  $p$  value correction was performed using the  
312 Benjamini-Hochberg (Benjamini and Hochberg, 1995) method and a 10% false discovery rate  
313 (FDR) was considered as the threshold of significance.

314

### 315 **Multidimensional scaling analysis for comparison of ATAC-Seq libraries**

316 Non-linear multidimensional scaling (NMDS) of the ATAC-Seq libraries was performed  
317 using the MASS::IsoMDS package (Venables and Ripley, 2002) to ensure that there were no

318 obvious outlying samples and that tissues of the same type clustered together in a biologically  
319 meaningful manner. A distance matrix (Manhattan distance) was produced using the  
320 consensus set of ATAC-Seq peaks and the normalized read counts as described in the  
321 previous section. The distance matrix was then processed for multidimensional scaling. NMDS  
322 was also used to compare the ATAC-Seq libraries prepared from either flash frozen muscle  
323 tissue or cryopreserved nuclei from two 6-week-old piglets.

324

### 325 **Transcription factor footprint analysis**

326 The HMM-based Identification of Transcription factor footprints (HINT) pipeline from  
327 the Regulatory Genomics Toolbox (RGT; v0.12.3) (Li et al., 2019) was used to compare  
328 transcription factor (TF) activity between developmental stages or piglet sizes. For a given  
329 comparison, the rgt-hint command in footprinting mode was used to identify TF footprints  
330 within peaks based on ATAC-Seq signal in each condition. When comparing consecutive  
331 developmental stages, the ATAC-Seq peaks identified for each stage were merged with  
332 Bedtools (v2.26.0), and footprints were identified within the merged set. When comparing  
333 different piglet sizes within a developmental time point, footprints were identified within the  
334 peak set for that time point (regardless of piglet size). ATAC-Seq signal for a given condition  
335 included aligned reads from all biological replicates (excluding libraries from cryopreserved  
336 nuclei), which were combined and filtered to remove duplicates using Samtools (v1.7).  
337 Footprints were matched to known motifs in JASPAR (Fornes et al., 2020) with rgt-motif  
338 analysis, and rgt-hint in differential mode was then used to compare the activity of each TF  
339 between two given conditions using bias-corrected signal.

340

### 341 **RNA isolation and quality control**

342 The RNA isolation protocol is described in full at  
343 [https://data.faang.org/api/fire\\_api/samples/ROSLIN\\_SOP\\_RNA\\_IsolationoftotalRNAfromfroz](https://data.faang.org/api/fire_api/samples/ROSLIN_SOP_RNA_IsolationoftotalRNAfromfroz)  
344 [entissuesamples\\_20200720.pdf](entissuesamples_20200720.pdf). RNA was extracted from approximately 60mg of tissue.  
345 Tissue samples were homogenised in 1 ml of TRIzol (Thermo Fisher Scientific, USA) with  
346 CK14 (VWR, USA) tissue homogenising ceramic beads on a Precellys Tissue Homogeniser  
347 (Bertin Instruments; France) at 5000 rpm for 20 sec. RNA was then isolated using the TRIzol  
348 protocol (Thermo Fisher Scientific, USA) and column purified to remove DNA and trace phenol  
349 using a RNeasy Mini Kit (Qiagen, Germany) following the manufacturer's instructions. RNA  
350 integrity (RIN<sup>e</sup>) was estimated on an Agilent 2200 TapeStation System (Agilent, USA) to  
351 ensure RNA quality was of RIN<sup>e</sup> > 7. RIN<sup>e</sup> and other quality control metrics for the RNA  
352 samples are included in Supplementary Table 4.

353

### 354 **Poly-A enriched library preparation and sequencing**

355 Strand-specific paired-end reads with a fragment length of 100 bp for each sample  
356 were generated by Edinburgh Genomics, using the Illumina TruSeq mRNA library preparation  
357 protocol (poly-A selected) (Illumina; Part: 15031047 Revision E). mRNA-Seq libraries were  
358 sequenced on an Illumina NovaSeq 6000 platform to generate >90 M paired end reads per  
359 sample (Min: 6.6e+07, Max:1.21e+08, Mean: 9.17+e07).

360

### 361 **RNA-Seq data analysis workflow**

362 The raw sequence data were quality controlled and trimmed using Trimmomatic  
363 (Bolger et al., 2014). The Kallisto aligner (Bray et al., 2016) was used for expression  
364 quantification of the RNA-Seq data. Briefly, a reference transcriptome fasta file of coding  
365 sequences was obtained from Sscrofa11.1 Ensembl v100 to build a Kallisto index file using  
366 default settings. The trimmed reads were then mapped for transcript level expression  
367 quantification (*de novo*) in kallisto with *--bias* option activated. The output tab separated value  
368 files were then imported to R using txlImport package (Soneson et al., 2016) for further analysis  
369 and visualisations.

370 The TPM expression estimates for each sample were investigated using principal  
371 component analysis (PCA) in FactoMineR to identify any spurious samples that did not cluster  
372 as expected (Lê et al., 2008). Differential expression (DE) analysis was performed only on the  
373 three sizes of foetal piglet (small, average and large) at day 90 of gestation. The Likelihood  
374 Ratio Test (LRT) model of DESeq2, including post-hoc analysis, was used with small size as  
375 the reference level i.e. Denominator in `log2FC (DESeqDataSetFromTximport(txi = dds, design  
376 = ~ Piglet size ))`. After multiple correction of p values using the BH method (Benjamini and  
377 Hochberg, 1995), a false discovery rate of 10% was considered as the significance threshold.  
378 Enrichment analysis of differentially expressed genes was performed using the EnrichR  
379 database (MGI Mammalian Phenotypes (Chen et al., 2013; Kuleshov et al., 2016).

380

### 381 **Allele-specific expression analysis workflow**

382 Prior to allele-specific expression (ASE) analysis of the RNA-Seq data, a reference  
383 mapping bias correction was performed as previously described in (Salavati et al., 2019).  
384 Briefly, a Sscrofa11.1 genome fasta file, GTF gene track and dbSNP VCF file were obtained  
385 from Ensembl v100. The trimmed reads were initially mapped to Sscrofa11.1 using HISAT2  
386 v2.1.0 (Kim et al., 2015). The mapped BAM files were then put through the mapping reference  
387 bias removal steps of WASP v0.3.4 (van de Geijn et al., 2015). After the removal of biased  
388 mapped reads, the resulting BAM files were processed in GATK v.4.10.1 (McKenna et al.,  
389 2010; Van der Auwera et al., 2013) with the ASEReadCounter tool to provide allelic read  
390 counts. The allelic counts were then processed in R using GeneiASE (Edsgård et al., 2016)  
391 static mode to screen for genes with significant allelic imbalance given all the heterozygous

392 sites within their coordinates. The mean allelic imbalance (Liptak score produced by  
393 GeneiASE output) across biological replicates for each gene was then visualised in R (R Core  
394 Team, 2017). In order to be considered robust, an ASE positive gene needed to be present in  
395 at least 75% of all biological replicates (for a group size of n=4). Heterozygote variants residing  
396 within genomic coordinates of ASE positive genes were labelled as ASE variants for  
397 downstream analysis.

398

### 399 **Overlay of differentially expressed genes and ATAC-Seq peaks**

400 An overlay of genes that were differentially expressed between the large and small  
401 sized foetal piglets at day 90 was performed using ATAC-Seq peaks within 10 kb vicinity of  
402 the differentially expressed genes (either upstream or downstream). This overlay would show  
403 us which of the differentially expressed genes had an ATAC-Seq peak in their vicinity and  
404 whether that peak was present in both large and small sized foetal piglets, or only in one of  
405 the two sizes. The distance from the start of the gene model to the start of the ATAC-Seq peak  
406 was used as a coordinate system (i.e. positive values meant the peak was either within the  
407 gene or within the 3' 10 kb upstream region of the gene, and negative values corresponded  
408 to 10 kb from the 5' end of the gene).

409

### 410 **Overlay of allelic expression imbalance and ATAC-Seq profiles**

411 An overlay of genes exhibiting significant allele specific expression (ASE) with the  
412 ATAC-Seq peaks present only in either small or large sized foetal piglets was also performed.  
413 Allelic imbalance exhibited in a gene needed to be present in  $\geq 75\%$  of biological replicates for  
414 it to be considered reproducible and biologically meaningful. This criterion was defined as  
415 follows:

$$416 \quad \text{representation \%} = \frac{\text{Animals expressing ASE gene}}{\text{All the animals in the phenotype group}} \times 100$$

417

418 The ATAC-Seq peaks specific to the large or small sized foetal piglets associated with  
419 genes exhibiting significant allelic expression imbalance were overlaid using custom track  
420 visualisation in R with ggplot2.

421

### 422 **Linking transcript expression level and DNA openness**

423 To investigate whether the expression level of a transcript could be linked to overlap  
424 with an ATAC-Seq peak we calculated a DNA openness score (DOS). For each transcript the  
425 exonic regions, 2 kb upstream of the first exon and 200 bp downstream of the coordinates of  
426 the last exon were compiled as a 'Genomic Ranges' object in R [GenomicFeatures v.3.11,  
427 GenomicRanges package v.3.11 (Lawrence et al., 2013)]. This object (here after referred to

428 as exon\_promoter) was overlaid with the ATAC-Seq peak genomic coordinates using the  
429 mergeByOverlaps function of the IRanges package v.3.11 (Lawrence et al., 2013) and the  
430 following flags (*subject = ATAC, query = exon\_promoter, maxgap = 1e4, type = "any"*). The  
431 resulting query was used to calculate the DOS, which measures the fraction of the total width  
432 of ATAC-Seq peaks overlapping a transcript (exonic regions) and its promoter to the total  
433 length of the exonic and promoter regions, for each transcript:

$$434 \quad DOS_{i..j} = \frac{\text{sum(ATAC peak widths } tx_{i..j})}{\text{length(exon\_promoter } tx_{i..j})}$$

435

436 The DOS range was then standardized in each sample using the following equation:

$$437 \quad DOS = \frac{DOS_{i..j} - \min(DOS_{i..j})}{\max(DOS_{i..j}) - \min(DOS_{i..j})}$$

438

$$0 < DOS \leq 1$$

439 The DOS was finally used for clustering the ATAC-Seq peaks in to 4 groups of: 1) high  
440 (DOS>0.8), 2) medium (0.5<DOS<0.8), 3) low (0.2<DOS<0.5), 4) minimal (DOS<0.2)  
441 accessible chromatin given transcript models. K-means clustering (initially 4 centres) was  
442 used to allocate transcripts in to the four groups and this information was used in combination  
443 with RNA-Seq expression estimates of transcripts to identify any potentials patterns i.e.  
444 between expression levels and DOS.

445

#### 446 **RNA-Seq variant calling and read backed haplotype phasing**

447 The RNA-Seq dataset was mapped against Sscrofa11.1 for the ASE analysis pipeline  
448 described above. The BAM files from the day 90 small sized foetal piglets were used for  
449 variant calling. A GATK variant calling workflow was used in order to discover transcriptomic  
450 variants in each of the three biological replicates. Briefly BAM files with marked duplicated  
451 reads were passed through Picardtools v2.23.0 for addition of read group information (RGID,  
452 RGSM, RGLB, RGPL and RGPU SAM flags (Li et al., 2009)). The HaplotypeCaller tool of  
453 GATK v.4.10.1 (McKenna et al., 2010; Van der Auwera et al., 2013) was used to produce  
454 genomic block resolution GVCF files (*-ERC GVCF*). This produced three GVCF files, one for  
455 each foetal piglet, that were then combined using the CombineGVCFs tool in GATK v4.10.1  
456 and passed through GenotypeGVCFs tool to call one set of genotypes for the three small size  
457 foetal piglet muscle samples at day 90. After filtering out the INDEL variants by using  
458 SelectVariants tool (*-select-type SNP*) a hard filtration was performed as described in  
459 Supplementary File 2.

460 The variants that passed all filtration criteria were taken forward to a haplotype phasing  
461 step using a WhatsHap v.1.0 (Patterson et al., 2015; Martin et al., 2016) pipeline. The  
462 readback phasing of haplotype blocks was performed using the default parameters of the

463 *whatshap phase* command. The resulting vcf file was converted to diploid transcriptome fasta  
464 files using BCFtools v.1.9 (Narasimhan et al.). These phased sets of haplotype fasta files (one  
465 set for each of the small sized foetal piglets) were used for ORF (open reading frame)  
466 prediction analysis of potential transcript isoforms in the 17 genes that showed significant  
467 allelic imbalance from the ASE analysis described above. The ORF prediction was performed  
468 using the predORF tool of systemPipeR v1.6.2 (Tyler and Girke, 2016) in R. The fasta files  
469 and predicted ORFs are included in Supplementary File 2 and 3, respectively. A GTF format  
470 track of the phased haplotype blocks was also produced using the *whatshap stats* tool for  
471 visualisation purposes (Supplementary File 2). Variants exhibiting ASE that corresponded to  
472 the phased haplotype blocks and the ATAC peaks for each of the day 90 small sized foetal  
473 piglets were then visualised in IGV v.2.8.9 (Thorvaldsdóttir et al., 2013).

474

### 475 **Statistical analysis software and packages**

476 All data analysis for this study was performed via bash scripting and use of R (R Core  
477 Team, 2017) on the University of Edinburgh research computing facility (Edinburgh, 2020).  
478 The data analysis protocol for ATAC-Seq and RNA-Seq are available at  
479 [https://data.faaug.org/api/fire\\_api/analyses/ROSLIN\\_SOP\\_ATAC-Seq\\_analysis\\_pipeline\\_20](https://data.faaug.org/api/fire_api/analyses/ROSLIN_SOP_ATAC-Seq_analysis_pipeline_20201113.pdf)  
480 [201113.pdf](https://data.faaug.org/api/fire_api/analyses/ROSLIN_SOP_ATAC-Seq_analysis_pipeline_20201113.pdf) and  
481 [https://data.faaug.org/api/fire\\_api/analyses/ROSLIN\\_SOP\\_RNA-Seq\\_analysis\\_pipeline\\_202](https://data.faaug.org/api/fire_api/analyses/ROSLIN_SOP_RNA-Seq_analysis_pipeline_20201113.pdf)  
482 [01113.pdf](https://data.faaug.org/api/fire_api/analyses/ROSLIN_SOP_RNA-Seq_analysis_pipeline_20201113.pdf).

483

### 484 **Results**

485

#### 486 **ATAC-Seq data from frozen pig muscle tissues**

487 ATAC-Seq libraries from four different batches (24 samples in total) were multiplexed  
488 and sequenced to achieve 2.02e+08 average reads per sample (Min: 9.8e+07, Max: 3.5e+08,  
489 Median: 1.97e+08). Reads were evenly distributed between barcodes across the first three  
490 batches. The fourth batch, which included only two samples that had a higher concentration  
491 of starting DNA, resulted in more reads per sequencing run compared to the other 22 samples  
492 (details in Supplementary File 4). Average chromosomal coverage across autosomes was  
493 7.2x, 4x for X, 3.2x for Y and 4.49e+04 for the mitochondrial chromosome (Supplementary  
494 Figure S1). Visual comparison in IGV of the ATAC-Seq consensus set of peaks and the  
495 RNA-Seq reads, mapped to the Sscrofa11.1 genome, was used to check for consistency  
496 between the two datasets. For example, Figure 2 and Supplementary Figure S2 show the  
497 ATAC-Seq and RNA-Seq data as parallel tracks for two housekeeping genes (*GPDH*, *ACTB*)  
498 and two genes related to muscle development (*MYBPC3*, *CASQ1*).



**A**

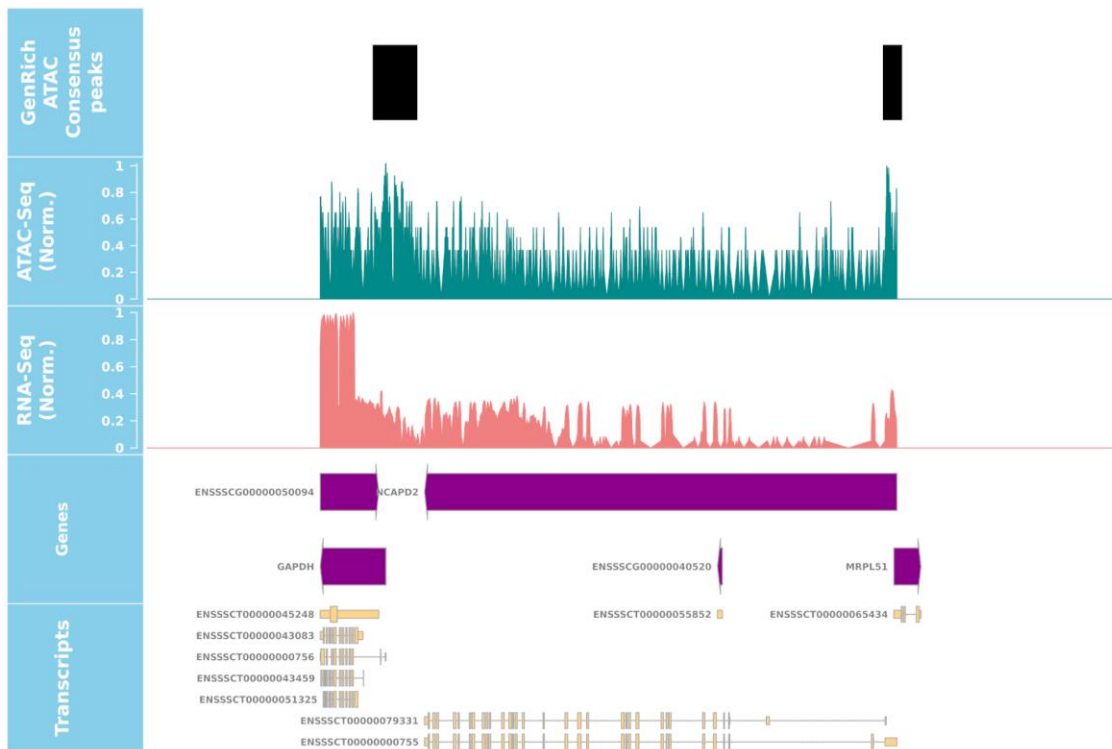

**B**

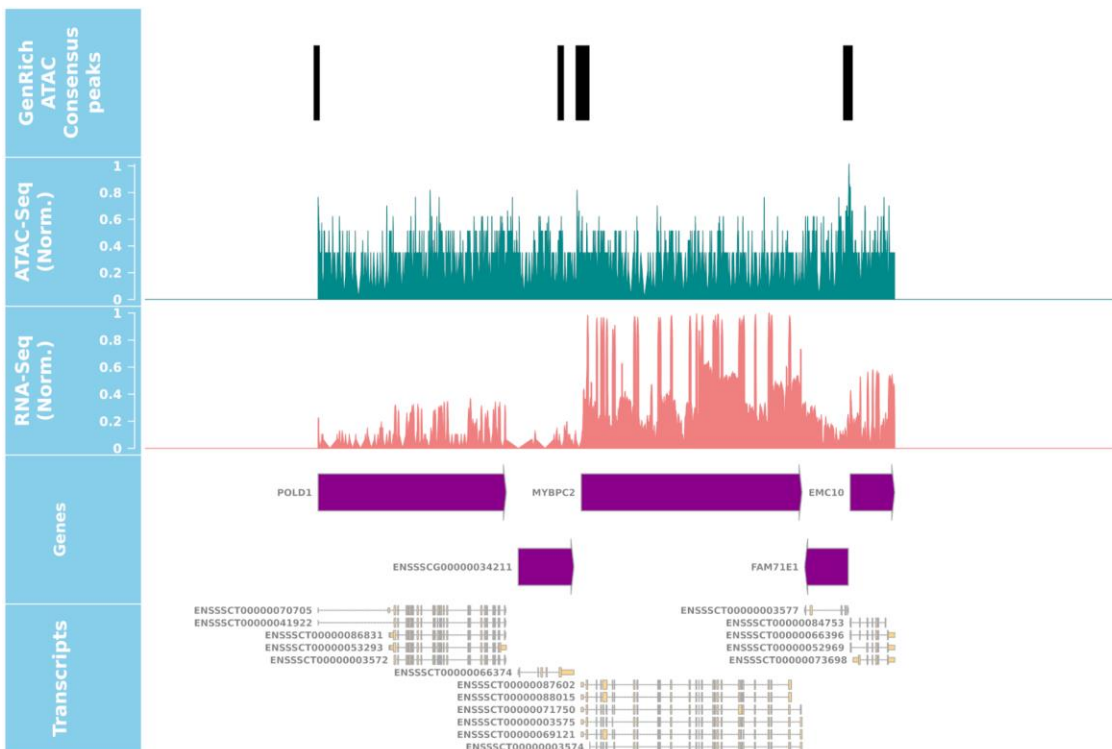

499

500 *Figure 2 : Genomic track visualisation of the ATAC-Seq and RNA-Seq datasets by presence*  
 501 *of the signal at gene coordinates of 2 genes GAPDH and MYBPC2. The normalised*



525 *by colour and piglet size by shape. Label colours are used to differentiate between*  
526 *Cryopreserved nuclei and Frozen tissue library preparation protocols.*

527

### 528 **Multidimensional scaling analysis of ATAC-Seq libraries prepared from either flash** 529 **frozen muscle tissue or cryopreserved nuclei**

530 Non-linear multidimensional scaling (NMDS) was also used to compare ATAC-Seq  
531 libraries prepared from either flash frozen muscle tissue or cryopreserved nuclei from two 6-  
532 week-old piglets. The two libraries prepared for the cryo-preserved nuclei samples clustered  
533 closely with the libraries prepared for flash frozen tissue indicating there was little difference  
534 in the data generated by the two protocols (Figure 3). Other metrics, including the percentage  
535 of ATAC-Seq peaks within promoter, proximal, distal regions or within a gene model were also  
536 used to compare the libraries prepared from cryopreserved nuclei and flash frozen tissue  
537 (Supplementary Figure S3). For each of the metrics chosen libraries prepared from  
538 cryopreserved nuclei and flash frozen tissue appeared broadly similar, with a slightly higher  
539 percentage of ATAC-Seq peaks in promoter regions ( $1 \leq 1$  kb) in cryopreserved nuclei and in  
540 distal intergenic regions in the libraries prepared from frozen tissues (Supplementary Figure  
541 S3).

542

### 543 **Distribution of ATAC-Seq peaks within genomic features**

544 The feature distribution of the ATAC-Seq peaks in all 24 samples is shown in Figure  
545 4A. On average > 6,500 peaks (including overlapping regions) were called in each sample  
546 (Min: 2.34e+03, Max: 1.42e+04, Median: 6.38e+03, Mean  $\pm$  SD: 6.72e+03  $\pm$  3.63e+03). More  
547 than 52% of the peaks were located in promoter regions in the majority of samples (19/24).  
548 There was a slight negative trend between increase in library size (depth of sequencing) and  
549 in the number of the peaks called (linear regression: slope= -6e-05 and  $R^2 = 0.22$ ). Detailed  
550 metrics can be found in Supplementary File 4. In five samples (day 90 Large [n=3], a day 90  
551 Average [n=1] and a day 90 Small [n=1]) the majority of peaks were located in distal intergenic  
552 regions (Figure 4A). We could not find any batch effect, in nuclei extraction or library  
553 preparation that might account for this and as such concluded that this variation was related  
554 to the samples themselves. There was also little observable difference in how the ATAC-Seq  
555 peaks were distributed within the genome of the libraries from cryopreserved nuclei relative to  
556 the libraries from flash frozen tissue (Figure 4A).

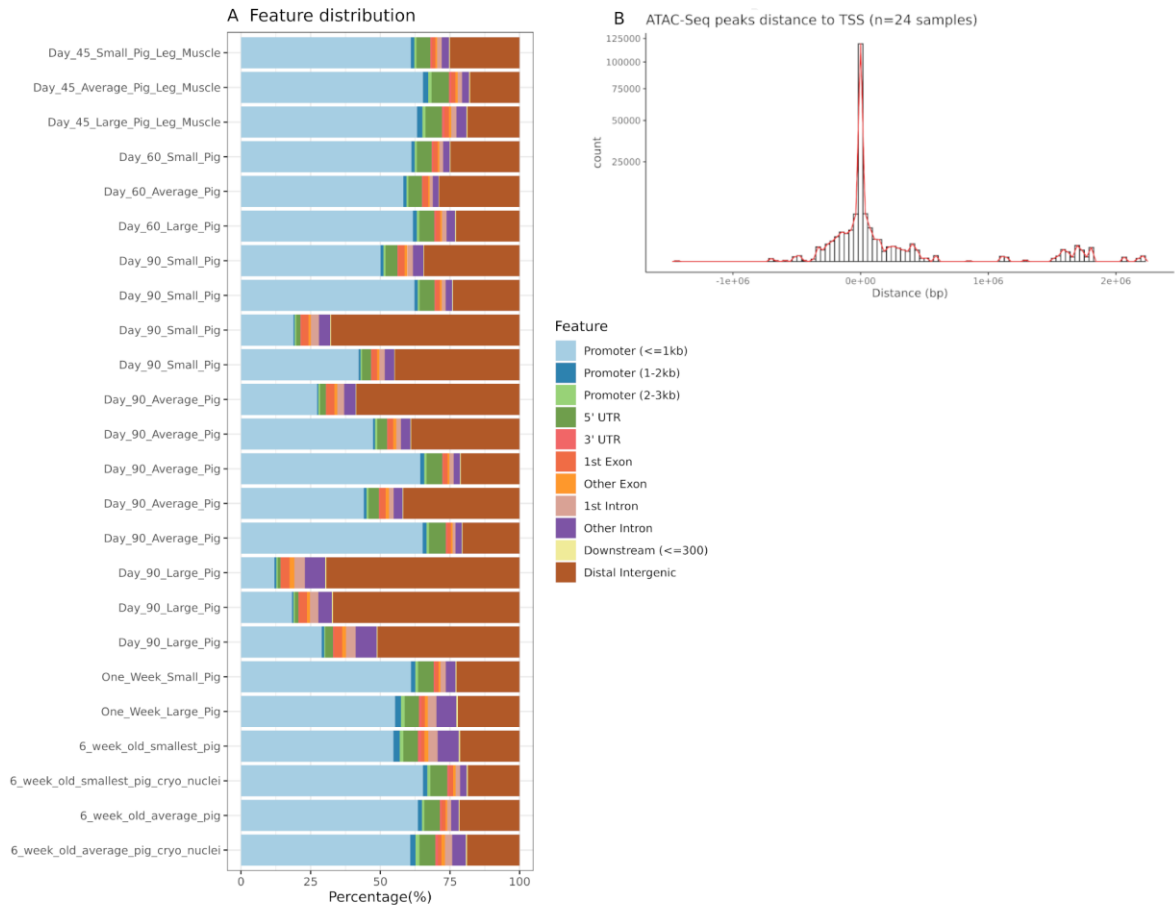

557

558 *Figure 4: Location of ATAC-Seq peaks within genomic features (A) and distance of ATAC-Seq*  
559 *peaks from the TSS. The samples are sorted by the developmental timeline (Day 45 to 6*  
560 *weeks old from top to bottom). B) The histogram of consensus ATAC-Seq peaks distance to*  
561 *TSS from all 24 samples. The cryopreserved nuclei samples are only present in the 6 week*  
562 *old group and are labelled as cryo\_nuclei.*

563

564 The breakdown of genomic feature categories in which peaks were located is  
565 presented in Table 2.

566

567 *Table 2. The frequency of ATAC-Seq peaks in each genomic feature category annotated by*  
 568 *ChipSeeker and averaged across samples (3,766 annotated peaks from a total of 4,661*  
 569 *peaks).*

| Features                  | Frequency (% mean $\pm$ SD) |
|---------------------------|-----------------------------|
| Promoter (1-2 kb)         | 1.08 $\pm$ 0.52             |
| Promoter ( $\leq$ 1 kb)   | 50.05 $\pm$ 16.96           |
| Promoter (2-3 kb)         | 0.74 $\pm$ 0.28             |
| 5' UTR                    | 4.27 $\pm$ 1.64             |
| 3' UTR                    | 0.45 $\pm$ 0.25             |
| 1st Exon                  | 2.07 $\pm$ 0.59             |
| Other Exon                | 1.08 $\pm$ 0.32             |
| 1st Intron                | 3.77 $\pm$ 0.78             |
| Downstream ( $\leq$ 3 kb) | 0.23 $\pm$ 0.08             |
| Distal Intergenic         | 34.33 $\pm$ 17.29           |

570

#### 571 **Proximity of ATAC-Seq peaks to transcription starts sites (TSSs)**

572 The distribution of the consensus set of peaks relative to the TSS is shown in Figure  
 573 4B. The highest density of ATAC-Seq peaks were within  $\pm$ 1 kb vicinity of the promoter  
 574 coordinates. When peaks were called for each sample individually, the majority of mapped  
 575 ATAC-Seq reads also mapped within  $\pm$ 1 kb of the transcription start sites (TSSs) as shown in  
 576 Supplementary Figure S4. As noted above for genomic feature distribution there was no  
 577 observable difference in how the ATAC-Seq peaks were positioned relative to the TSS in the  
 578 libraries from cryopreserved nuclei relative to the libraries from flash frozen.

579

#### 580 **Differential peak analysis of ATAC-Seq read counts using a consensus set of peaks**

581 Differential peak analysis revealed 377 ATAC-Seq peaks from the consensus peak set  
 582 in which the read count differently significantly between the developmental time points. These  
 583 peaks were annotated using *Sscrofa11.1* corresponding to 724 unique transcripts (245 unique  
 584 genes). 109 peaks, were in unannotated intergenic regions. Nearly half of the peaks exhibiting  
 585 differential read counts, between developmental time points, were located in intronic regions  
 586 and only 11.1% resided in promoters as shown in Table 3.

587

588 *Table 3: Genomic feature distribution of ATAC-Seq peaks where read counts were*  
 589 *significantly different between the day 45, day 60, day 90, 1 week and 6 week time points.*

| Features | Count | Frequency (%) |
|----------|-------|---------------|
| Intronic | 185   | 49.1          |

|            |     |      |
|------------|-----|------|
| Intergenic | 109 | 28.9 |
| Promoter   | 42  | 11.1 |
| 3' UTR     | 12  | 3.18 |
| Proximal   | 10  | 2.65 |
| 5' UTR     | 8   | 2.12 |
| CDS        | 8   | 2.12 |
| Exonic     | 3   | 0.79 |

590

591 The read counts for the peaks that differed significantly between time points are shown  
 592 in Figure 5A as normalised fragment counts. A detailed list of these peaks is included in  
 593 Supplementary File 2 and visualised in Supplementary Figure S5.

**A**

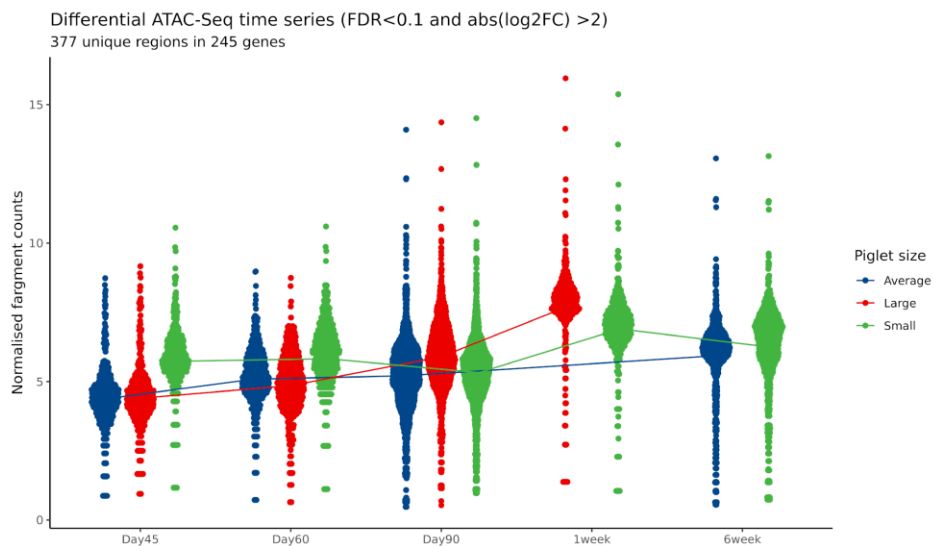

**B**

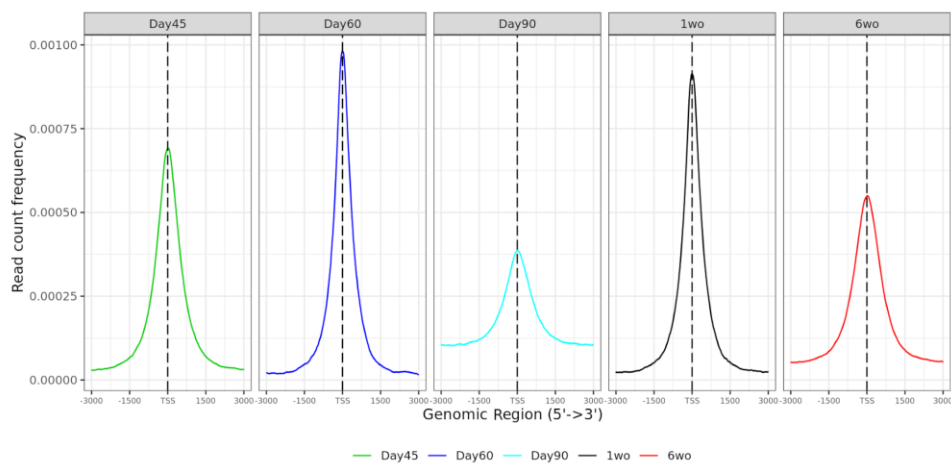

594

595 *Figure 5: Read count frequency and normalised read counts of ATAC-Seq peaks across*  
 596 *developmental time points. A) Differential peak analysis of ATAC-Seq peaks across time*

597 points including the piglet size and litter as a fixed variable in the DESeq2 LRT model. The  
598 significantly differentially expressed peaks (DEP) are plotted in each time point and coloured  
599 by the piglet size. The line represents the average normalised read counts per time point for  
600 all DEPs. B) Shows the read count frequency relative to TSS for ATAC-Seq peaks called using  
601 all the samples from each time point at once.

602

603 Differential peak analysis at day 90 between the 3 piglet sizes revealed 4 peaks with  
604 significantly different read counts. These peaks were located on chromosomes 1 and 17  
605 (Table 4).

606

607 Table 4: Consensus ATAC-Seq peaks with significantly different read counts between  
608 Average vs Small (AvS) and Large vs Small (LvS) piglet sizes at day 90. Chr: chromosome,  
609 log<sub>2</sub>FC: log<sub>2</sub> transformed fold change, pAdj: BH adjusted p value.

610

| Chr: start - end      | Width | Peak     | Support | Log2fc   | pAdj     | Type       |
|-----------------------|-------|----------|---------|----------|----------|------------|
| 1:201673457-201674013 | 557   | peak711  | 7       | AvS 29.9 | 2.08E-11 | promoter   |
| 1:201673457-201674013 | 557   | peak711  | 7       | LvS 25.7 | 7.34E-06 | promoter   |
| 17:8909863-8910380    | 518   | peak4174 | 3       | AvS 29.4 | 2.08E-11 | intron     |
| 17:8909863-8910380    | 518   | peak4174 | 3       | LvS 31.2 | 1.17E-09 | intron     |
| 17:31262598-31274177  | 11580 | peak4263 | 24      | LvS 1.4  | 3.00E-02 | promoter   |
| 17:63381073-63391319  | 10247 | peak4470 | 24      | AvS -1.0 | 4.55E-07 | intergenic |

611

612 Peak711, which was supported by seven biological replicates (samples), resided in  
613 the promoter region of the *IFN-DELTA-9-201* transcript of a porcine specific interferon type I.  
614 IFN-DELTA9 is ubiquitously expressed in pig tissues and plays a role in the antiviral response  
615 of reproductive and respiratory systems (Sang et al., 2010). Peak4174 was located within the  
616 intronic region of a novel lncRNA gene *ENSSSCG00000045137*. Peak 4263 was located in  
617 the promoter region of another novel lncRNA gene *ENSSSCG00000042953* with no currently  
618 known orthologs. Peak 4470 was mapped to an intergenic region on chromosome 17 distal to  
619 *ENSSSCG00000036974* and proximal to end of the chromosome. A detailed list of peaks with  
620 significantly different read counts between piglet sizes is included in Supplementary File 5.

621

622 **Changes in ATAC-Seq peak width distribution and read count frequency around the**  
623 **TSS during development**

624 Peak width analysis was performed using Genrich for each developmental time point  
625 in the following groups: gestational day 45 (Day45 n=3); gestational day 60 (Day60 n=3);  
626 gestational day 90 (Day90 n=12); neonatal 1 week old (1wo n=2) and 6 weeks old (6wo n=4)  
627 (Supplementary Figure S6). A density distribution of the width of the ATAC-Seq peaks and the  
628 median width size for each time point is included in Supplementary Figure S6. The day 90  
629 samples showed significantly smaller peak width in comparison to the other developmental  
630 time points. The ATAC-Seq peak calls in BED format are included in Supplementary File 1.  
631 In addition to peak width analysis we also performed an analysis of read count frequency  
632 around the TSSs, which also varied between the five developmental time points (Figure 5B).  
633 Read count frequency around the TSSs increased between day 45 and day 60 but was  
634 reduced by day 90 (Figure 5B). This was followed by a gradual increase in the read count  
635 frequency around TSSs in the samples from the one and six-week-old piglets.

636

637 **Piglet size specific differences in ATAC-Seq peaks at day 90 of gestation**

638 A further comparison of ATAC-Seq peaks at day 90 of gestation from foetal piglets of  
639 large (n=3), average (n=5) and small (n=4) body size was performed. A size specific set of  
640 peaks, present only in each size of foetal piglet and not shared across sizes (e.g. Day 90  
641 Large\_specific) were identified (Figure 6). The data for size-specific peaks for small and large  
642 piglets only represented a small percentage of the total peaks and the data are quite noisy  
643 (Figure 6). From a total of 34,966 peaks called in large size foetal piglets 9.82% (3,436 peaks),  
644 and from 49,060 in small size foetal piglets 12.2% (6,031 peaks), were specific to each size  
645 group. A detailed summary of the number of peaks for each size is included in Supplementary  
646 File 1. The read count frequency around TSSs of the size specific sets of peaks was noticeably  
647 lower than when all peaks (i.e. including both those that were shared and those that were size  
648 specific) were analysed (Figure 6A). The results show both a shared chromatin openness  
649 profile and size specific openness profiles indicating a difference in genome regulation  
650 between the three sizes of foetal piglet at day 90 of gestation (Figure 6A). The distribution of  
651 ATAC-Seq peaks within genomic features were skewed towards intergenic regions for the  
652 large and small sized foetal piglets as shown in Figure 6B. Fewer size-specific ATAC-Seq  
653 peaks were located within 1 kb of TSSs in comparison with the ATAC-Seq peaks that were  
654 shared across all three sizes of foetal piglet (Figure 6C).

655



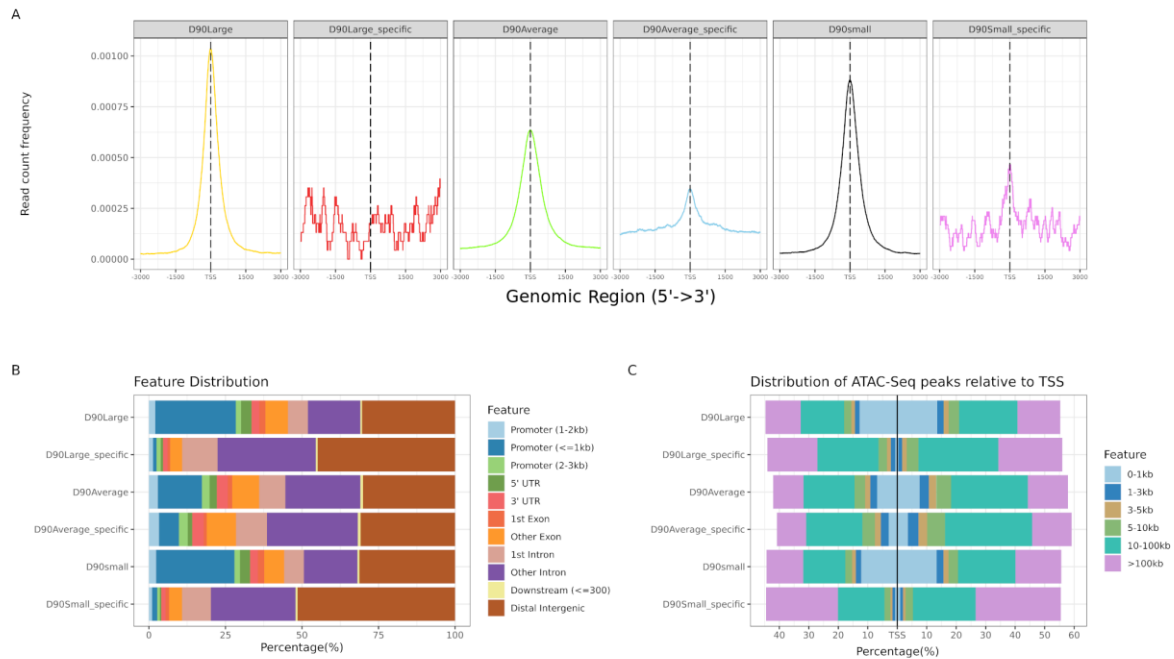

656

657 *Figure 6: Mapping of ATAC-Seq peaks at Day 90 of gestation that were: i) specific to small or*  
 658 *large sized piglets or ii) shared across samples. A) mapping relative to the TSS, B) distribution*  
 659 *within genomic features and C) distribution of relative to the TSS.*

660

### 661 **Transcription factor activity footprinting of the ATAC-Seq peaks (time and piglet size)**

662 Transcription factor footprinting analysis across the developmental time points did not  
 663 show any significantly different HINT scores (Figure 7A). In the comparison between large and  
 664 small piglet size at day 90 samples, 5 differentially active transcription factors (TFs) (*GMEB2*,  
 665 *TFAP2C(var.2)*, *HOXD12*, *FOXH1* and *CEBPE*) were detected using JASPAR2020 database  
 666 annotation. The TF *CEBPE* CCAAT-Enhancer-Binding Protein-Beta, showed the highest level  
 667 of significant depleted TF activity in the small piglets compared to the large piglets (HINT z  
 668 score -14.35) (Figure 7B). *CEBPE* is known to be upregulated after muscle injury and be highly  
 669 associated with muscle strength in human and mouse models (Harries et al., 2012). *GMEB2*,  
 670 a glucocorticoid receptor expression regulator (Kaul et al., 2000), was the only TF with  
 671 significantly higher enrichment in the small size piglets (HINT z score 4.29) in comparison to  
 672 the large piglets (Figure 7C). Details of the TF footprinting are shown in Table 5.

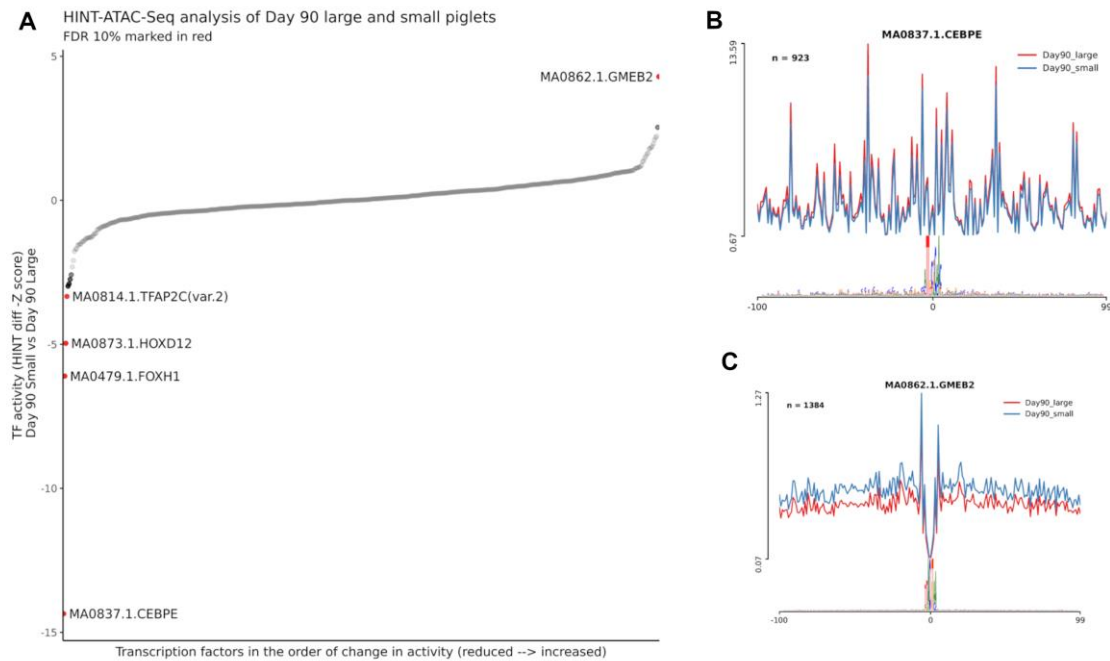

673

674 *Figure 7: HINT pipeline analysis of the ATAC-Seq dataset for day 90 samples compared*  
 675 *between large and small piglet size. A) The differential transcription factor activity between*  
 676 *two piglet sizes at day 90 sorted by the HINT z-score value. The red dots are statistically*  
 677 *significant (FDR 10%) showing hyperactivity of GMEB2 in the small size piglets muscle tissues*  
 678 *along with lowered activity of TFAP2C, HOXD12, FOXH1 and CEBPE transcription factors*  
 679 *(higher in the large size piglets). The TF activity in the vicinity of the corresponding motif*  
 680 *between large and small size piglets are shown in B) for CEBPE and C) for GMEB2.*

681

682 *Table 5. Transcription factor footprinting analysis of the ATAC-Seq dataset using HINT and*  
 683 *JASPAR annotation database. FDR: false discovery rate (10% was considered significant)*  
 684 *Comparison was performed in day 90 samples Small to Large (S/L direction of activity value)*

| Motif                  | TF_Activity | Z_score | P_values | FDR      |
|------------------------|-------------|---------|----------|----------|
| MA0837.1.CEBPE         | -0.71       | -14.35  | 1.01E-46 | 5.59E-44 |
| MA0479.1.FOXH1         | -0.30       | -6.10   | 1.04E-09 | 2.87E-07 |
| MA0873.1.HOXD12        | -0.24       | -4.96   | 6.95E-07 | 1.28E-04 |
| MA0862.1.GMEB2         | 0.21        | 4.29    | 1.74E-05 | 2.4E-03  |
| MA0814.1.TFAP2C(var.2) | -0.16       | -3.33   | 8.49E-04 | 9.3E-02  |

685

## 686 Analysis of gene expression using RNA-Seq

687 We generated RNA-Seq data from the same muscle tissue samples that were used to  
 688 generate the ATAC-Seq libraries, in order to link regions of open chromatin with gene  
 689 expression. The transcript expression estimates for the muscle tissue samples from the five

690 developmental time points (26 samples in total) were calculated as Transcript per Million  
691 mapped reads (TPM) using Kallisto. The TPM expression estimates were then investigated  
692 using PCA (Figure 8) to identify any samples that did not group as expected according to  
693 developmental time point. The samples from each developmental time point clustered  
694 together as expected in the first two dimensions of the PCA (Figure 8).

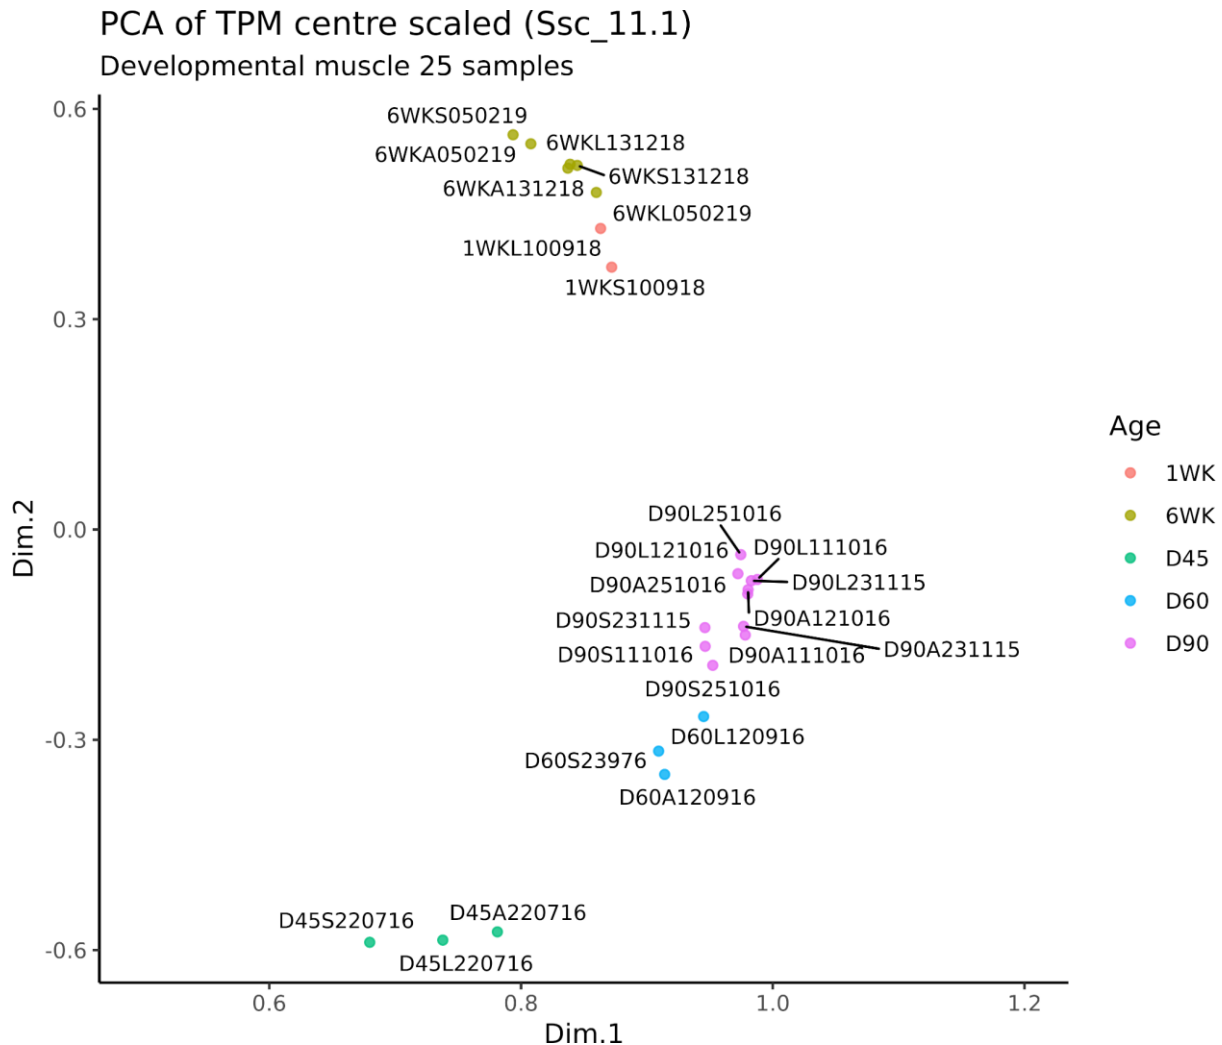

695  
696 *Figure 8: Principal Component Analysis (PCA) of gene expression estimates (as TPM) from*  
697 *the RNA-Seq data for each sample. The samples cluster according to developmental stage*  
698 *with clear separation of neonatal and post-natal samples. D45 = Gestational Day 45; D60 =*  
699 *Gestational Day 60; D90 = Gestational Day 90; 1WK = Neonatal 1 week old ;6WK = Juvenile*  
700 *6 weeks old.*

701

### 702 **Analysis of genes that were differentially expressed between the three sizes of foetal** 703 **piglet at day 90 of gestation**

704 Differential gene expression analysis was performed using the TPM values for the  
705 three sizes of foetal piglet (small, average, large) at day 90 of gestation. Between the three  
706 sizes of foetal piglet 89 genes (FDR 10%), were found to be differentially expressed. When

707 average vs small sized foetal piglets were compared, 58 up- and 31 down-regulated genes  
708 were detected. When large vs small sized foetal piglets were compared, 54 up- and 35 down-  
709 regulated genes were detected. Differentially expressed genes with an adjusted  $p$  value (FDR  
710  $< 0.1$ ) and  $\log_2$  fold change ( $\log_2FC$ )  $\geq 0.1$  are annotated in Figure 9. The comparison  
711 between large and small sized foetal piglets resulted in the largest number ( $n=89$ ) of  
712 differentially expressed genes. The list of differentially expressed genes and detailed analysis  
713 metrics can be found in Supplementary Table 5. Enrichment analysis of the 89 differentially  
714 expressed genes was performed using the EnrichR database (MGI Mammalian Phenotypes  
715 (Chen et al., 2013; Kuleshov et al., 2016). Amongst the significantly enriched ontologies were  
716 MP:0004069 abnormal muscle spindle morphology, MP:0001052 abnormal innervation  
717 pattern to muscle and MP:0004792 abnormal synaptic vesicle number. The details of this  
718 enrichment analysis are included in Supplementary Figure S7. Many of the genes that were  
719 differentially expressed between large and small and average and small foetal piglets are  
720 involved in skeletal muscle function and growth (Figure 9). The gene calsequestrin 1 (*CASQ1*),  
721 for example, which was 1.54 fold up-regulated ( $\log_2FC$   $0.63 \pm 0.17$  adjusted  $p$  value =  $2.0e-$   
722  $02$ ) in large relative to small foetal piglets is the skeletal muscle specific member of the  
723 calsequestrin protein family, and is highly expressed in skeletal muscle in adult pigs, see  
724 (<http://biogps.org/pigatlas/>) (Freeman et al., 2012; Summers et al., 2020). *MYBPC2*, a gene  
725 that encodes myosin binding protein C, was also 2 fold up-regulated ( $\log_2FC$   $1.02 \pm 0.22$   
726 adjusted  $p$  value =  $3.78e-04$ ) in large relative to small foetal piglets (Figure 9). It has also been  
727 shown to be highly expressed in the muscle of pigs, see (<http://biogps.org/pigatlas/>) (Freeman  
728 et al., 2012; Summers et al., 2020). The muscle specific transcription factor myogenin (*MYOG*)  
729 was down-regulated, ( $\log_2FC$   $0.28 \pm 0.09$  adjusted  $p$  value =  $9.0e-02$ ), in small relative to large  
730 foetal piglets (Figure 9).

731

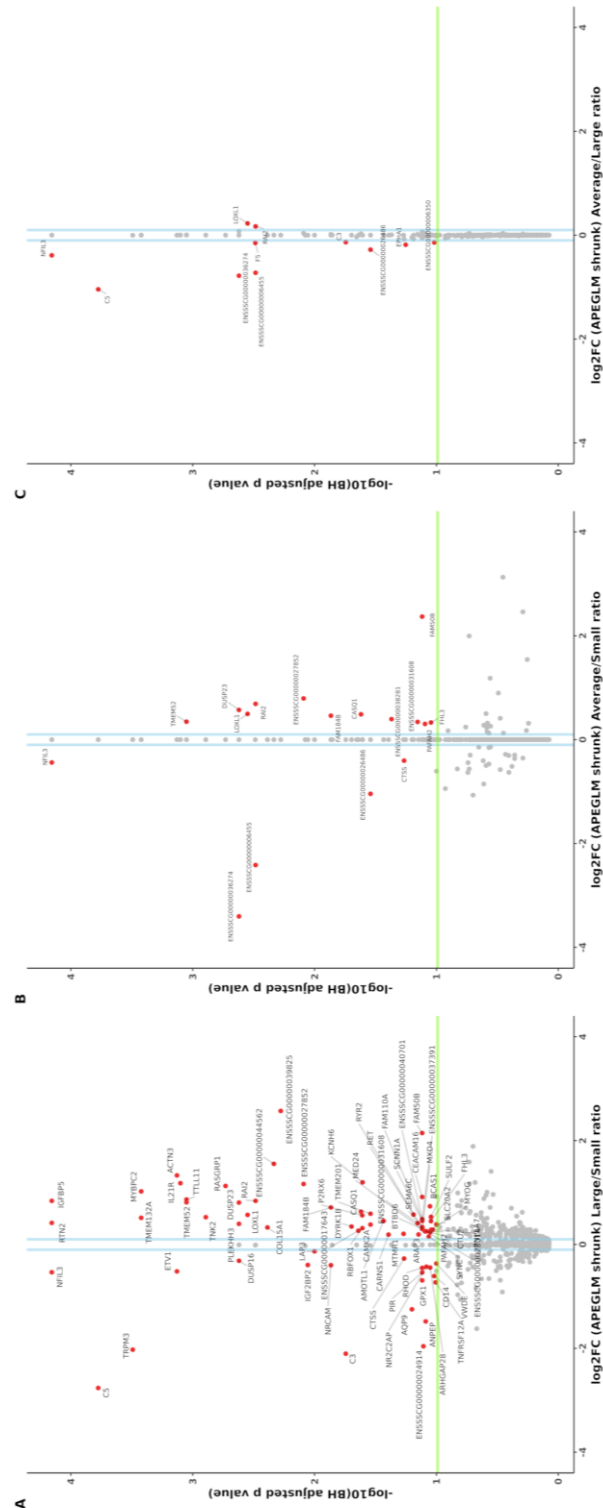

732

733 *Figure 9: Differentially expressed genes (RNA-Seq) between large, average and small sized*  
 734 *piglets at Day 90 of gestation. A) Large vs Small B) Average vs Small C) Average vs Large.*  
 735 *Differentially expressed genes are shown in red, the log<sub>2</sub>FC >0.1 in blue and the significance*  
 736 *threshold as a green line. The ApeGLM shrinkage method was used to normalised the log fold*  
 737 *change plotted on the x axis. Detailed methodology is described in (Love et al., 2014).*

738

## 739 Overlay of the RNA-Seq differentially expressed genes and ATAC-Seq peaks from large 740 vs small foetal piglets at day 90 of gestation

741 A further overlay of the ATAC-Seq and RNA-Seq datasets was performed for the  
742 day 90 large and small sized foetal piglets. ATAC-Seq peaks annotated using the Sscrofa11.1  
743 Ensembl gene track information (black) and differentially expressed genes between the large  
744 vs small sized foetal piglets at day 90 (green) are shown in Figure 10. This analysis allowed  
745 us to determine which of the differentially expressed genes had an ATAC-Seq peak that was  
746 specific to either large or small sized piglets in its vicinity. The distribution of ATAC-Seq peaks  
747 around TSSs (within a 3 kb distance) was plotted for peaks specific to the large foetal piglets  
748 (Figure 10A), or specific to the small foetal piglets (Figure 10B). Size specific peaks within the  
749 5'UTR region of four differentially expressed genes, *MYOG*, ryanodine receptor 2 (*RYR2*),  
750 transmembrane 4 L six family member 4 (*TM4SF4*) and interleukin 21 receptor (*IL21R*) (Figure  
751 9), were only observed in the small foetal piglets (Figure 10B). There was no evidence of size  
752 specific peaks near these genes in the large sized foetal piglets (Figure 10B). Of the four  
753 genes, *MYOG* is known to be highly expressed in skeletal muscle tissue, see  
754 (<http://biogps.org/pigatlas/>) (Freeman et al., 2012; Summers et al., 2020). In some cases, a  
755 size-specific ATAC-Seq peak was located within the 5' UTR region of a gene that was involved  
756 in muscle growth and down-regulated in small relative to large piglets. *MYOG*, for example,  
757 was down-regulated in small sized foetal piglets (Figure 9), with a regulatory region 315 bp in  
758 size 8,769 bp upstream of the TSS, that was present in the small sized piglets but absent in  
759 the large sized foetal piglets (Figure 10 A&B).

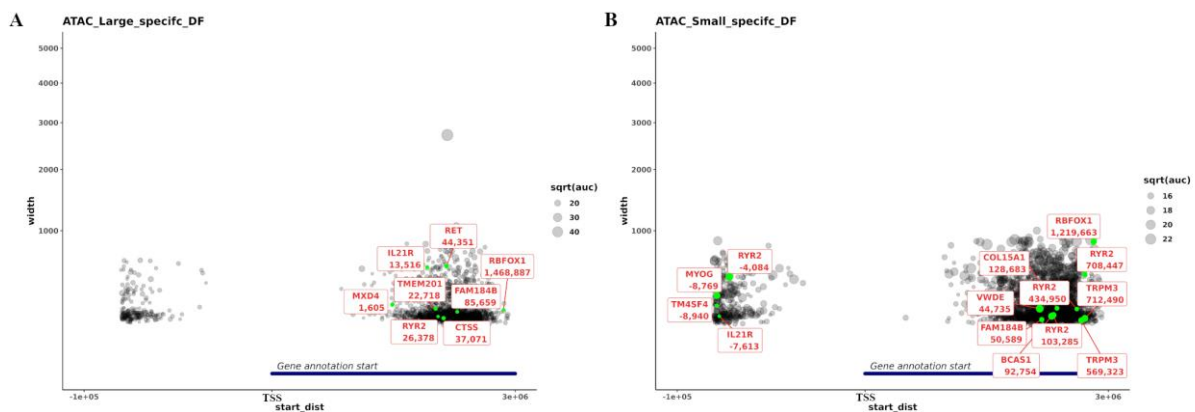

760  
761 *Figure 10: Proximity of ATAC-Seq peaks specific to large (A) and small (B) piglets and*  
762 *differentially expressed genes. Differentially expressed genes are marked in green. The x-axis*  
763 *(start\_dist) is the distance from the start of the gene model to the start of the ATAC-Seq peak,*  
764 *for +ve values the peak is either within the gene or within 10 kb of the 3' end and for -ve values*  
765 *the peak is within 10 kb of the 5' end of the gene. The y-axis indicates the width of the peak.*  
766 *As the y axis represent the width of the peak, the larger the node the wider the ATAC-Seq*  
767 *peak.*

## 768 **Association between transcript expression and chromatin openness**

769 A significantly different number of size specific peaks were observed in differentially  
770 expressed genes in small compared to large piglets (t-test;  $p$  value = 0.007). This difference  
771 did not directly translate to a difference in DNA openness score (DOS) between the sizes of  
772 piglet. A DOS was calculated for every transcript to associate transcript expression (as TPM)  
773 with chromatin openness in each of the small and large sized foetal piglets separately at  
774 day 90 of gestation. In large sized foetal piglets (Supplementary Figure S8 B, D & F) the  
775 average transcript expression was significantly higher (t-test;  $p$  value=0.006) than in the small  
776 sized foetal piglets (Supplementary Figure S8 A, C & E). This average transcript expression  
777 estimate (TPM) is shown by the red-dotted line in Supplementary Figure S8 in every sample.  
778 No overlap between the top 30 highly expressed transcripts (annotated by transcript IDs in  
779 Figure S8) between the large and small sized foetal piglets was observed indicating that there  
780 was no observable trend between the transcript TPM and DOS values. Clustering the dataset,  
781 based on transcript expression using four previously described categories, did not result in  
782 any meaningful grouping either (shown as four colours of dots in Figure S8).

783

## 784 **Allele specific expression analysis of RNA-Seq data and overlap with size specific** 785 **ATAC-Seq peaks**

786 An imbalance in allele specific expression (ASE) was present in 17 genes expressed  
787 in foetal piglets at day 90 of gestation. Four genes *PXDN*, Collagen Type I Alpha 1 Chain  
788 (*COL1A1*), DEAD-box helicase 6 (*DDX6*) and *ENSSSCG0000009327* (High Mobility Group  
789 Box 1, *HMGB1*), showed significant ASE in all three sizes of piglet (Figure 11A). Peroxidase  
790 (*PXDN*) exhibited significant allelic imbalance in the small sized foetal piglets, with 100%  
791 representation across all three biological replicates (Figure 11A). Peroxidase (*PXDN*) is a  
792 basement membrane protein involved in tissue integrity and formation of extracellular matrix  
793 (Colon et al., 2017). *COL1A1*, which is also involved in formation of the extracellular matrix  
794 exhibited significant allelic imbalance in all three biological replicates of both large and small  
795 foetal piglets (100% representation) (Figure 11A). *ARRDC3*, which encodes arrestin domain  
796 containing 3, on the other hand exhibited allelic imbalance only in the small sized foetal piglets,  
797 across all three biological replicates (100% representation). ATAC-Seq peaks specific to the  
798 small sized foetal piglets for genes exhibiting allelic imbalance are visualised in Figure 11B.  
799 The ATAC-Seq peaks for *PXDN* and *COL1A1* were present in both the large and small sized  
800 foetal piglets but at different genomic coordinates specific to each size (Figure 11B). The  
801 ATAC-Seq peaks associated with *ARRDC3* were only present in the small sized foetal piglets  
802 (Figure 11B).

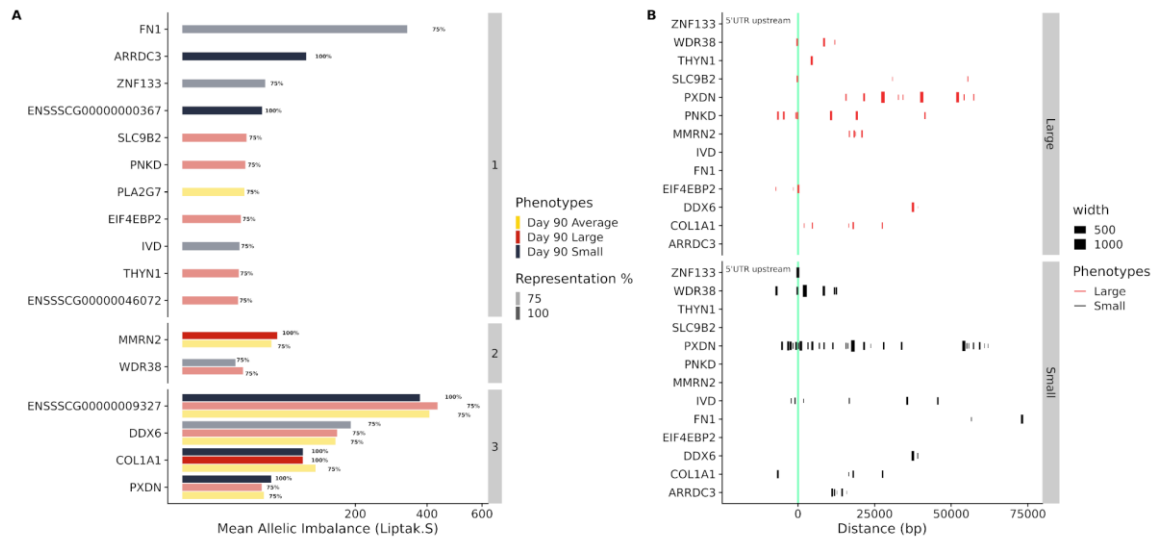

803

804 *Figure 11: Genes exhibiting significant allele specific expression in small, average and large*  
805 *sized piglets at Day 90 of gestation. A) genes exhibiting allelic imbalance in up to three*  
806 *biological replicates for each size of piglet (genes were classified into three groups according*  
807 *to whether allelic balance was detected in all three biological replicates: 3= exhibited in large,*  
808 *average and small, 2= exhibited in either small and large or average and large, 1= exhibited*  
809 *only in one group). The percentage representation (75% to 100 %) of biological replicates for*  
810 *the gene exhibiting allelic imbalance is indicated by the transparency of the bars. The genes*  
811 *showing ASE in each of the three sizes of piglet are indicated using coloured bars that*  
812 *represent the level of allelic imbalance calculated using the Liptak score (and output metric of*  
813 *the GeneiASE pipeline). B) Distance of ATAC-Seq peaks, specific to either large or small sized*  
814 *piglets, from the TSS of genes showing significant allelic imbalance.*

815

### 816 **Allele-specific expression positive variants in small sized piglet haplotypes**

817 A read backed approach was used for haplotype phasing the RNA-Seq data from the  
818 small sized foetal piglets. This haplotype block discovery method was performed to locate  
819 potential variants (and corresponding genotypes) that might contribute to the allelic imbalance  
820 in expression observed in the genes described above. Overall, 53,439 haplotype blocks were  
821 identified in three biological replicates with an average length of 379 bp  $\pm$  2,881 bp (mean  $\pm$   
822 SD). The longest block was located on chromosome 14 and was 248 kb length  
823 (chr14:56,857,698-57,105,958) overlapping the first two exons of solute carrier family 35  
824 member F3 (*SLC35F3*) and the complete genomic coordinates of *U6*. Haplotype blocks  
825 residing within coordinates of multiple ATAC-Seq peaks in genes showing ASE (i.e. *ARRDC3*  
826 and *PXDN*) are shown using IGV genomic browser in Supplementary Figures S9 and S10.  
827 Two haplotype blocks (corresponding IDs 98441748 and 98442176 in Supplementary File 6;  
828 *D90S\_phased.gtf*) in the first intronic region of *ARRDC3* overlapped with ATAC-Seq peaks



829 specific to small sized foetal piglets shown in pink and black regions in Supplementary Figure  
830 S9. Two haplotypes blocks containing variants exhibiting imbalance in allelic expression were  
831 also identified (haplotype block ID 98440164 containing variant *rs320066059* and ID  
832 98444537 containing variant *rs343363588*) in the second and first exonic regions of *ARRDC3*  
833 respectively. A similar overlay of the genomic coordinates of *PXDN* showed 11 ASE positive  
834 variants overlapping four haplotype blocks (IDs 132337596, 132349428, 132357889 and  
835 132361644) (Supplementary Figure S10). These haplotype blocks span multiple exons of four  
836 known isoforms of *PXDN* (exons 6 – 23), shown as green blocks in Supplementary Figure  
837 S10. Two haplotype blocks (IDs 26618720 and 26619492) containing three ASE positive  
838 variants (*rs332129500*, *rs336409927* and *rs320640601*) were also detected in the *ZNF133*  
839 gene (Supplementary Figure S11). Supplementary File 6 contains all the tracks required for  
840 visualisation of this analysis in the Integrated Genomic Viewer (IGV) (Thorvaldsdóttir et al.,  
841 2013).

842

## 843 Discussion

844 In this study we used ATAC-Seq and RNA-Seq to improve our understanding of gene  
845 expression and regulation in developing pig muscle. The aims of the study were to: 1) Optimise  
846 the Omni-ATAC-Seq protocol for frozen pig muscle tissue; 2) Map regions of open chromatin  
847 in semitendinosus muscle tissue from small, average and large sized male piglets at five  
848 developmental stages (day 45, 60 & 90 of gestation, one and six weeks post-natal) and 3)  
849 Analyse RNA-Seq data from the same tissues to generate gene and allele-specific expression  
850 profiles.

851 To fulfil aim one, we optimised the Omni-ATAC-Seq protocol (Corces et al., 2017) for  
852 frozen muscle tissue. This, to our knowledge, is the first time the Omni-ATAC-Seq protocol  
853 (Corces et al., 2017) has been optimised for frozen tissue from a farmed animal species. Other  
854 studies have used ATAC-Seq to profile open chromatin in freshly sorted cell types e.g.  
855 (Foissac et al., 2019) or isolated and cryopreserved nuclei from dissociated tissue e.g.  
856 (Halstead et al., 2020b, 2020a). Working with sorted cells was outside the scope of this study.  
857 We were, however, able to perform a comparison of ATAC-Seq libraries prepared from either  
858 flash frozen tissue or cryopreserved nuclei for a small subset of samples. We found that the  
859 datasets generated by the two methods were broadly comparable, in terms of the distribution  
860 of ATAC-Seq reads mapping to genomic regions and in the percentage of reads mapping to  
861 exons. The ability to utilise flash frozen tissue effectively for ATAC-Seq is advantageous for  
862 two reasons. Firstly, many legacy samples from large animal studies have been flash frozen  
863 then archived at -80°C and represent a very valuable resource if they can be utilised.  
864 Secondly, flash freezing is straightforward to undertake and standardise, especially when the  
865 logistics of collecting samples from large animals can be technically challenging (Wong et al.,

866 2012). For this study we have only optimised the Omni-ATAC-Seq protocol for flash frozen  
867 muscle tissue samples from pigs. Expanding the protocol to other tissues and other species  
868 should be relatively straightforward, although some tissue-specific optimisation will be  
869 required, particularly for tissues that are known to be complex to work with.

870 For aim two of the study, we generated open chromatin profiles, in the form of  
871 ATAC-Seq peaks, for *semitendinosus* muscle from piglets from five developmental stages.  
872 The developmental stages were chosen according to their relevance to muscle development.  
873 ATAC-Seq peaks mapped as expected to promotor regions and within 1 kb of the TSS, which  
874 is consistent with studies across different species (Foissac et al., 2019; Yue et al., 2021). A  
875 study of *longissimus dorsi* muscle from pig embryos at days 45, 70 and 100 conducted by  
876 (Yue et al., 2021) showed that 30%, 21%, and 14% of the peaks were identified in promoter  
877 regions respectively. Of these peaks, 91% mapped to within -1 kb and +100 bp of the TSS  
878 (Yue et al., 2021). A cross-species analysis of ATAC-Seq data showed that in mice, goats,  
879 cattle, pigs and chicken, 10-15% of ATAC-Seq peaks were located within up to 5 kb of the  
880 TSS, and were therefore considered as promoters (Foissac et al., 2019). The results from our  
881 study showed that a majority of the ATAC-Seq peak frequency was located within  $\pm 1$  kb of the  
882 TSS, with the remaining primarily located within distal intergenic regions.

883 The distribution of ATAC-Seq peaks in intergenic regions at day 90 in large and small  
884 sized piglets indicated that piglets of different sizes show changes in genome regulation  
885 primarily at intergenic sites (i.e. differential enhancer activity). Day 90 is a critical stage of  
886 muscle development when fibre formation ceases and muscle growth accelerates through  
887 fibre hypertrophy (Oksbjerg et al., 2004). Significant up-regulation of genes involved in muscle  
888 growth also occur at day 90 (Zhao et al., 2015; Ayuso et al., 2016; Yue et al., 2021). As such  
889 chromatin may be more open at this developmental stage to allow transcription factor binding  
890 prior to the rapid muscle growth that occurs during the early postnatal period (Rudar et al.,  
891 2019). Differential peak analysis revealed the read count frequency around the TSS also  
892 differed throughout development, increasing to Day 90 then decreasing after birth. This trend  
893 indicates that the global open chromatin profile of muscle tissue changes during gestation in  
894 pigs. A similar trend was reported by (Yue et al., 2021) who reported widespread increases in  
895 accessible chromatin and increasing regulatory complexity in developing pig embryos through  
896 days 45, 75 and 100 of gestation. Studies profiling open chromatin in preimplantation embryos  
897 found global differences in chromatin accessibility between embryo stages in humans (Wu et  
898 al., 2018; Liu et al., 2019) and cattle (Halstead et al., 2020c). ATAC-Seq datasets for post  
899 implantation embryos in humans and other mammalian species are limited. ChIP-seq  
900 analyses of a wide variety of histone markers in the brain, heart, and liver of early human  
901 embryos identified developmental stage-specific patterns in the epigenome (Yan et al., 2016).  
902 The sample size in our study was small, with only a few biological replicates for most points,

903 with the exception of Day 90. Even so, our results, are in agreement with other recent studies  
904 e.g. (Yue et al., 2021), and indicate that chromatin accessibility and regulation of gene  
905 expression changes throughout development in the pig muscle. This is significant for studies  
906 aiming to understand when during development functional variation in the genome has an  
907 effect on the adult phenotype. For example, in this study, transcription factor footprint analysis,  
908 showed that the transcription factor *GMEB2*, which increases sensitivity to glucocorticoids  
909 (Kaul et al., 2000), had significantly higher TF activity in small relative to large size piglets at  
910 day 90 of gestation. This finding is potentially phenotypically relevant because low birth weight  
911 piglets have been shown to have higher in utero-cortisol levels than their normal birth weight  
912 litter mates (Roelofs et al., 2019) .

913 To address aim three, we analysed gene and allele specific expression information for  
914 the same muscle tissue samples. We used this approach to compare gene expression and  
915 chromatin openness between foetal piglets of different size at day 90 of gestation. Other  
916 studies have used a similar approach to investigate the effect of histone modification on the  
917 expression of genes involved in placental development in pigs (Han et al., 2019) and  
918 chromatin accessibility in pre-natal muscle development (Yue et al. 2021). Differences in open  
919 chromatin were reflected in the expression of genes involved in muscle growth. Analysis of  
920 the RNA-Seq data revealed that genes associated with muscle growth, including *CASQ1*,  
921 *MYBPC2* and *MYOG*, were differentially expressed in large relative to small piglets.  
922 Differential expression of myogenic genes (e.g. *MYOG*) in pig muscle has been previously  
923 reported by (Felicioni et al., 2020) who compared intrauterine growth restricted and normal  
924 weight piglets. *CASQ1* encodes the skeletal muscle specific member of the calsequestrin  
925 protein family, is related to muscle metabolism, and has been shown to be highly expressed  
926 in fat pig breeds (Zhao et al., 2011). In this study, *CASQ1* was up-regulated in large relative  
927 to small foetal piglets. *MYBPC2* encodes the fast isoform of the myosin binding protein C  
928 family (Weber et al., 1993). In Piedmontese (*GDF8* mutant) cattle *MYBPC2* is highly  
929 expressed in foetal muscle, reflecting fast glycolytic fibre structural differentiation (Lehnert et  
930 al., 2007). In this study, *MYBPC2* was highly up-regulated in large versus small foetal piglets,  
931 potentially reflecting a greater proportion of fast glycolytic muscle fibres.

932 *MYOG* was down regulated in small sized foetal piglets relative to large sized foetal  
933 piglets. *MYOG* is essential for myoblast fusion during muscle development  
934 (<https://www.uniprot.org/uniprot/P49812>) and associated with QTLs, for body weight at birth  
935 ([https://www.animalgenome.org/cqi-bin/QTLdb/SS/qdetails?QTL\\_ID=8656](https://www.animalgenome.org/cqi-bin/QTLdb/SS/qdetails?QTL_ID=8656)) and backfat  
936 thickness ([https://www.animalgenome.org/cqi-bin/QTLdb/SS/qdetails?QTL\\_ID=8657](https://www.animalgenome.org/cqi-bin/QTLdb/SS/qdetails?QTL_ID=8657)),  
937 according to Genome Wide Association Studies (GWAS) (Xue and Zhou, 2006). Other studies  
938 measuring gene expression also found *MYOG* was down-regulated in muscle cell types from  
939 low birth weight piglets (Felicioni et al., 2020; Stange et al., 2020) and in pigs with high levels

940 of intramuscular fat (Lim et al., 2017). When we compared the ATAC-Seq and RNA-Seq data  
941 we identified an ATAC-Seq peak within the 5' UTR region of *MYOG* (315 bp in size, 8,769 bp  
942 upstream of the TSS) that was present in the small foetal piglets but missing from the large  
943 foetal piglets for Day 90 of gestation. In future work we plan to remove this peak using CRISPR  
944 genome editing and measure the effect on primary muscle cells in culture. Further validation  
945 of the variants within this regulatory region would be useful to determine whether they might  
946 underlie variation in intramuscular fat or myofiber specification as was the case for the  
947 regulatory variant recently characterised in *MYH3* (Cho et al., 2019). Open chromatin regions  
948 in the vicinity of genes that were significantly differentially expressed in large relative to small  
949 piglets were of interest in this study, and other similar studies e.g. (Yue et al., 2021) particularly  
950 because they are located near TSS or promoter coordinates. Further functional validation is  
951 required to determine whether chromatin accessibility has any direct effect on the expression  
952 level of differentially expressed genes in this context.

953 Further analysis of the RNA-Seq data revealed several genes exhibiting allelic  
954 expression imbalance. Size-specific ATAC-Seq peaks were observed for some of the genes  
955 exhibiting allelic expression imbalance. ATAC-Seq peaks for gene *ARRDC3*, for example,  
956 were only present in the small sized foetal piglets. *ARRDC3* is associated with obesity and  
957 adipocyte differentiation and function in mice (Carroll et al., 2017) and with growth and  
958 muscularity traits in cattle (Bolormaa et al., 2014; Saatchi et al., 2014; Abo-Ismael et al., 2017;  
959 Carroll et al., 2017). We used haplotype phasing to identify candidate genetic variants within  
960 *ARRDC3* exhibiting allelic expression imbalance. The haplotype blocks were consistent  
961 across all three small sized foetal piglets. These variants in *ARRDC3*, and those within other  
962 genes exhibiting an imbalance in expression, including *PXDN* and *ZNF133*, would be suitable  
963 candidates for further functional validation. Variants with this type of functional information  
964 have been shown in cattle to be useful for the prediction of complex traits (Xiang et al., 2019).

965 The datasets we have generated for this study provide a foundation for incorporating  
966 functional information in statistical analyses, to increase the precision and power with which  
967 we can fine map high quality causal variants in pigs. This would make it possible to increase  
968 the accuracy of genomic selection and the efficiency with which breeding turns genetic  
969 variation into genetic gain. The next stage of the study is to leverage the ATAC-Seq and  
970 RNA-Seq data with a very large dataset of genetic variants from production pigs to determine  
971 whether any trait-linked variants are located within the open chromatin regions we have  
972 identified for muscle tissue. The characterisation of regulatory and expressed regions of the  
973 genome in muscle tissues also provides a basis for genome editing to promote functional  
974 genomic variants in pig breeding programmes (Jenko et al., 2015; Hickey et al., 2016;  
975 Johnsson et al., 2019), providing a route to application for FAANG data.

976

977 **Conclusions**

978           The dataset we have generated provides a powerful foundation to investigate how the  
979 genome is regulated in production pigs and contributes valuable functional annotation  
980 information to define and predict the effects of genetic variants in pig breeding programmes.  
981 The outcomes of the study will: 1) help us to understand the molecular drivers of muscle  
982 growth in pigs; 2) provide a foundation for functionally validating target genomic regions in *in*  
983 *vitro* systems and 3) identify high quality causative variants for muscle mass with the goal of  
984 harnessing genetic variation and turning it into sustainable genetic gain in pig breeding  
985 programmes.

986

987 **Acknowledgements**

988           The authors would like to thank the staff and farm technicians at both Dryden Farm  
989 and Easter Howgate. Charis Hogg provided assistance in planning and collection of samples  
990 from the foetal time points and Christopher Proudfoot coordinated sampling of the six-week-  
991 old pigs. ATAC-Seq and RNA-Seq libraries were sequenced by Edinburgh Genomics. The  
992 authors are also grateful for the support of the FAANG Data Coordination Centre  
993 (<http://data.faang.org>) in the upload and archiving of the sample data and metadata.

994

995 **Ethics Statement**

996           All projects from which samples for this study were collected were reviewed and  
997 approved by The Roslin Institute, University of Edinburgh's Animal Work and Ethics Review  
998 Board (AWERB). All animal work was carried out under the regulations of the Animals  
999 (Scientific Procedures) Act 1986.

1000

1001 **Data Availability**

1002           The raw sequence data for the ATAC-Seq samples (n=24) are available via the  
1003 European Nucleotide Archive (ENA) under accession number PRJEB41485. Details of all  
1004 samples processed for the RNA-Seq dataset (n=26) can be accessed via the ENA under  
1005 accession number PRJEB41488. The sample metadata is available via the BioSamples  
1006 database under sample accession numbers SAMEA7178119, SAMEA7178120,  
1007 SAMEA7178122, SAMEA7178123, SAMEA7178124, SAMEA7178125, SAMEA7178126,  
1008 SAMEA7178127, SAMEA7178134, SAMEA7178138, SAMEA7178142, SAMEA7178149,  
1009 SAMEA7178150, SAMEA7178153, SAMEA7178159, SAMEA7178160, SAMEA7178164,  
1010 SAMEA7178178, SAMEA7178179, SAMEA7178180, SAMEA7178182, SAMEA7178183,  
1011 SAMEA7178184, SAMEA7178185, SAMEA7178187 and SAMEA7178188. These datasets  
1012 are curated and submitted to FAANG data portal according to FAANG's sample and  
1013 experimental guidelines (Harrison et al., 2018). All the sample, experiment and analysis

1014 protocols for this study are also available through the FAANG Data Coordination Centre via  
1015 the following links:  
1016 [https://data.faang.org/api/fire\\_api/samples/ROSLIN\\_SOP\\_ATAC\\_Seq\\_DNAIsolationandTag](https://data.faang.org/api/fire_api/samples/ROSLIN_SOP_ATAC_Seq_DNAIsolationandTagmentation_Frozen_Muscle_Tissue_20200720.pdf)  
1017 [mentation\\_Frozen\\_Muscle\\_Tissue\\_20200720.pdf](https://data.faang.org/api/fire_api/samples/ROSLIN_SOP_ATAC-Seq_DNAIsolationandTagmentation_Cryopreserved_Muscle_Nuclei_Preparations_20200720.pdf),  
1018 [https://data.faang.org/api/fire\\_api/samples/ROSLIN\\_SOP\\_ATAC-Seq\\_DNAIsolationandTag](https://data.faang.org/api/fire_api/samples/ROSLIN_SOP_ATAC-Seq_DNAIsolationandTagmentation_Cryopreserved_Muscle_Nuclei_Preparations_20200720.pdf)  
1019 [mentation\\_Cryopreserved\\_Muscle\\_Nuclei\\_Preparations\\_20200720.pdf](https://data.faang.org/api/fire_api/samples/ROSLIN_SOP_ATAC-Seq_LibraryPreparationandSizeSelection_20200720.pdf),  
1020 [https://data.faang.org/api/fire\\_api/samples/ROSLIN\\_SOP\\_ATAC-Seq\\_LibraryPreparationan](https://data.faang.org/api/fire_api/samples/ROSLIN_SOP_ATAC-Seq_LibraryPreparationandSizeSelection_20200720.pdf)  
1021 [dSizeSelection\\_20200720.pdf](https://data.faang.org/api/fire_api/samples/ROSLIN_SOP_ATAC-Seq_LibraryPreparationandSizeSelection_20200720.pdf),  
1022 [https://data.faang.org/api/fire\\_api/samples/ROSLIN\\_SOP\\_RNA\\_IsolationoftotalRNAfromfroz](https://data.faang.org/api/fire_api/samples/ROSLIN_SOP_RNA_IsolationoftotalRNAfromfrozentissuesamples_20200720.pdf)  
1023 [entissuesamples\\_20200720.pdf](https://data.faang.org/api/fire_api/samples/ROSLIN_SOP_RNA_IsolationoftotalRNAfromfrozentissuesamples_20200720.pdf),  
1024 [https://data.faang.org/api/fire\\_api/experiments/ROSLIN\\_SOP\\_ATAC-Seq\\_Cryopreservednu](https://data.faang.org/api/fire_api/experiments/ROSLIN_SOP_ATAC-Seq_Cryopreservednucleisamplesfrompigmusclletissue_Experimental_Protocol_20200720.pdf)  
1025 [cleisamplesfrompigmusclletissue\\_Experimental\\_Protocol\\_20200720.pdf](https://data.faang.org/api/fire_api/experiments/ROSLIN_SOP_ATAC-Seq_Cryopreservednucleisamplesfrompigmusclletissue_Experimental_Protocol_20200720.pdf),  
1026 [https://data.faang.org/api/fire\\_api/experiments/ROSLIN\\_SOP\\_ATAC-Seq\\_Frozenpigmusclleti](https://data.faang.org/api/fire_api/experiments/ROSLIN_SOP_ATAC-Seq_Frozenpigmusclletissuesamples_Experimental_Protocol_20200720.pdf)  
1027 [ssuesamples\\_Experimental\\_Protocol\\_20200720.pdf](https://data.faang.org/api/fire_api/experiments/ROSLIN_SOP_ATAC-Seq_Frozenpigmusclletissuesamples_Experimental_Protocol_20200720.pdf),  
1028 [https://data.faang.org/api/fire\\_api/experiments/ROSLIN\\_SOP\\_RNA\\_RNAIsolationandSeque](https://data.faang.org/api/fire_api/experiments/ROSLIN_SOP_RNA_RNAIsolationandSequencingofPigMuscleTissues_Experimental_Protocol_20200720.pdf)  
1029 [ncingofPigMuscleTissues\\_Experimental\\_Protocol\\_20200720.pdf](https://data.faang.org/api/fire_api/experiments/ROSLIN_SOP_RNA_RNAIsolationandSequencingofPigMuscleTissues_Experimental_Protocol_20200720.pdf),  
1030 [https://data.faang.org/api/fire\\_api/analyses/ROSLIN\\_SOP\\_ATAC-Seq\\_analysis\\_pipeline\\_20](https://data.faang.org/api/fire_api/analyses/ROSLIN_SOP_ATAC-Seq_analysis_pipeline_20201113.pdf)  
1031 [201113.pdf](https://data.faang.org/api/fire_api/analyses/ROSLIN_SOP_ATAC-Seq_analysis_pipeline_20201113.pdf),  
1032 [https://data.faang.org/api/fire\\_api/analyses/ROSLIN\\_SOP\\_RNA-Seq\\_analysis\\_pipeline\\_202](https://data.faang.org/api/fire_api/analyses/ROSLIN_SOP_RNA-Seq_analysis_pipeline_20201113.pdf)  
1033 [01113.pdf](https://data.faang.org/api/fire_api/analyses/ROSLIN_SOP_RNA-Seq_analysis_pipeline_20201113.pdf),  
1034 [https://data.faang.org/api/fire\\_api/samples/ROSLIN\\_SOP\\_Collection\\_of\\_tissue\\_samples\\_for](https://data.faang.org/api/fire_api/samples/ROSLIN_SOP_Collection_of_tissue_samples_for_ATAC-Seq_and_RNA-Seq_from_large_animals_20200618.pdf)  
1035 [\\_ATAC-Seq\\_and\\_RNA-Seq\\_from\\_large\\_animals\\_20200618.pdf](https://data.faang.org/api/fire_api/samples/ROSLIN_SOP_Collection_of_tissue_samples_for_ATAC-Seq_and_RNA-Seq_from_large_animals_20200618.pdf),  
1036 [https://data.faang.org/api/fire\\_api/samples/ROSLIN\\_SOP\\_Cryopreservation\\_of\\_Nuclei\\_for](https://data.faang.org/api/fire_api/samples/ROSLIN_SOP_Cryopreservation_of_Nuclei_for_ATACSeq_using_GentleMACS_20201119.pdf)  
1037 [ATACSeq\\_using\\_GentleMACS\\_20201119.pdf](https://data.faang.org/api/fire_api/samples/ROSLIN_SOP_Cryopreservation_of_Nuclei_for_ATACSeq_using_GentleMACS_20201119.pdf). All the supplementary Tables, Figures and  
1038 files are also available from <https://doi.org/10.6084/m9.figshare.13562285>.

1039

#### 1040 **Author Contributions**

1041 ELC devised the study and acquired the funding with MAH, FXD and ALA. CJA and  
1042 CS designed the experiment from which the foetal tissues were collected. YCA, FXD, CS and  
1043 CJA collected the samples from the foetal and one week old piglets. MS and ELC collected  
1044 the samples from the six week old piglets. MS and ELC performed the cryopreservation of  
1045 nuclei. ELC and MAH performed the ATAC-Seq library preparation. ELC and YCA extracted  
1046 the RNA. MMH provided advice on ATAC-Seq library preparation and performed the  
1047 transcription factor footprinting analysis. SAW collated all sample metadata for the project. MS  
1048 performed all bioinformatic and data analysis, except the analysis of ASE which he performed  
1049 with SAW. ELC wrote the manuscript with MS. MJ provided critical assessment of the  
1050 manuscript. All authors read and approved the final version.

1051

## 1052 **Conflict of Interest**

1053 The authors declare that the research was conducted in the absence of any  
1054 commercial or financial relationships that could be construed as a potential conflict of interest.

1055

## 1056 **Code Availability**

1057 The bioinformatic pipelines used for processing the ATAC-Seq (mapping and peak  
1058 calling), RNA-Seq (transcript level expression analysis) and Allele specific expression are  
1059 available via a code repository at [https://msalavat@bitbucket.org/msalavat/pig\\_muscle.git](https://msalavat@bitbucket.org/msalavat/pig_muscle.git)  
1060 respectively ([https://bitbucket.org/msalavat/pig\\_muscle/src/master/](https://bitbucket.org/msalavat/pig_muscle/src/master/)).

1061

## 1062 **Funding**

1063 The work was funded by an Institute Strategic Programme Pump-Priming grant  
1064 ‘Profiling Open Chromatin in Developing Pig Muscle’, BBSRC Institute Strategic Programme  
1065 grants awarded to the Roslin Institute ‘Farm Animal Genomics’ (BBS/E/D/2021550) and  
1066 ‘Prediction of genes and regulatory elements in farm animal genomes’ (BBS/E/D/10002070)  
1067 and by BBSRC grant ‘Ensembl – adding value to animal genomes through high quality  
1068 annotation’ (BB/S02008X/1). ELC and MAH are both supported by University of Edinburgh  
1069 Chancellors’ Fellowships. This research was also funded in part by the Bill & Melinda Gates  
1070 Foundation and with UK aid from the UK Foreign, Commonwealth and Development Office  
1071 (Grant Agreement OPP1127286) under the auspices of the Centre for Tropical Livestock  
1072 Genetics and Health (CTLGH), established jointly by the University of Edinburgh, SRUC  
1073 (Scotland’s Rural College), and the International Livestock Research Institute. YCA was  
1074 funded by the National Agency for Research and Development (ANID) /Scholarship Program  
1075 / DOCTORADO BECAS CHILE [grant number 2016 - 72170349]. The findings and  
1076 conclusions contained within are those of the authors and do not necessarily reflect positions  
1077 or policies of the Bill & Melinda Gates Foundation nor the UK Government.

1078

## 1079 **References**

- 1080 Abo-Ismael, M. K., Brito, L. F., Miller, S. P., Sargolzaei, M., Grossi, D. A., Moore, S. S., et al.  
1081 (2017). Genome-wide association studies and genomic prediction of breeding values  
1082 for calving performance and body conformation traits in Holstein cattle. *Genet. Sel.*  
1083 *Evol.* 49, 82. doi:10.1186/s12711-017-0356-8.
- 1084 Aiello, D., Patel, K., and Lasagna, E. (2018). The myostatin gene: an overview of  
1085 mechanisms of action and its relevance to livestock animals. *Anim. Genet.* 49, 505–  
1086 519. doi:10.1111/age.12696.
- 1087 Anders, S., Pyl, P. T., and Huber, W. (2015). HTSeq—a Python framework to work with

- 1088 high-throughput sequencing data. 31, 166–169. doi:10.1093/bioinformatics/btu638.
- 1089 Andersson, L., Archibald, A. L., Bottema, C. D., Brauning, R., Burgess, S. C., Burt, D. W., et  
1090 al. (2015). Coordinated international action to accelerate genome-to-phenome with  
1091 FAANG, the Functional Annotation of Animal Genomes project. *Genome Biol.* 16, 57.  
1092 doi:10.1186/s13059-015-0622-4.
- 1093 Ashmore, C. R., Addis, P. B., and Doerr, L. (1973). Development of Muscle Fibers in the  
1094 Fetal Pig. *J. Anim. Sci.* 36, 1088–1093. doi:10.2527/jas1973.3661088x.
- 1095 Ayuso, M., Fernández, A., Núñez, Y., Benítez, R., Isabel, B., Fernández, A. I., et al. (2016).  
1096 Developmental stage, muscle and genetic type modify muscle transcriptome in pigs:  
1097 Effects on gene expression and regulatory factors involved in growth and metabolism.  
1098 *PLoS One* 11, e0167858. doi:10.1371/journal.pone.0167858.
- 1099 Benjamini, Y., and Hochberg, Y. (1995). Controlling the False Discovery Rate: A Practical  
1100 and Powerful Approach to Multiple Testing on JSTOR. *Source J. R. Stat. Soc. Ser. B*  
1101 57, 289–300. Available at:  
1102 [https://www.jstor.org/stable/pdf/2346101.pdf?refreqid=excelsior%3A8080132077b9217](https://www.jstor.org/stable/pdf/2346101.pdf?refreqid=excelsior%3A8080132077b9217878a58e47abbcf2d8)  
1103 [878a58e47abbcf2d8](https://www.jstor.org/stable/pdf/2346101.pdf?refreqid=excelsior%3A8080132077b9217878a58e47abbcf2d8) [Accessed October 27, 2015].
- 1104 Bolger, A. M., Lohse, M., and Usadel, B. (2014). Trimmomatic: a flexible trimmer for Illumina  
1105 sequence data. *Bioinformatics* 30, 2114–20. doi:10.1093/bioinformatics/btu170.
- 1106 Bolormaa, S., Pryce, J. E., Reverter, A., Zhang, Y., Barendse, W., Kemper, K., et al. (2014).  
1107 A Multi-Trait, Meta-analysis for Detecting Pleiotropic Polymorphisms for Stature,  
1108 Fatness and Reproduction in Beef Cattle. *PLoS Genet.* 10, 1004198.  
1109 doi:10.1371/journal.pgen.1004198.
- 1110 Bray, N. L., Pimentel, H., Melsted, P., and Pachter, L. (2016). Near-optimal probabilistic  
1111 RNA-seq quantification. *Nat. Biotechnol.* 34, 525–527. doi:10.1038/nbt.3519.
- 1112 Buenrostro, J. D., Giresi, P. G., Zaba, L. C., Chang, H. Y., and Greenleaf, W. J. (2013).  
1113 Transposition of native chromatin for fast and sensitive epigenomic profiling of open  
1114 chromatin, DNA-binding proteins and nucleosome position. *Nat. Methods* 10, 1213–  
1115 1218. doi:10.1038/nmeth.2688.
- 1116 Buenrostro, J. D., Wu, B., Chang, H. Y., and Greenleaf, W. J. (2015). ATAC-seq: A Method  
1117 for Assaying Chromatin Accessibility Genome-Wide. *Curr. Protoc. Mol. Biol.* 109,  
1118 21.29.1-21.29.9. doi:10.1002/0471142727.mb2129s109.
- 1119 Carroll, S. H., Zhang, E., Wang, B. F., LeClair, K. B., Rahman, A., Cohen, D. E., et al.  
1120 (2017). Adipocyte arrestin domain-containing 3 protein (Arrdc3) regulates uncoupling  
1121 protein 1 (Ucp1) expression in white adipose independently of canonical changes in  $\beta$ -  
1122 adrenergic receptor signaling. *PLoS One* 12. doi:10.1371/journal.pone.0173823.
- 1123 Chen, E. Y., Tan, C. M., Kou, Y., Duan, Q., Wang, Z., Meirelles, G. V., et al. (2013). Enrichr:  
1124 interactive and collaborative HTML5 gene list enrichment analysis tool. *BMC*



- 1125 *Bioinformatics* 14, 128. doi:10.1186/1471-2105-14-128.
- 1126 Cho, I.-C., Park, H.-B., Ahn, J. S., Han, S.-H., Lee, J.-B., Lim, H.-T., et al. (2019). A  
1127 functional regulatory variant of MYH3 influences muscle fiber-type composition and  
1128 intramuscular fat content in pigs. *PLOS Genet.* 15, e1008279.
- 1129 Clark, E. L., Archibald, A. L., Daetwyler, H. D., Groenen, M. A., Harrison, P. W., Houston, R.  
1130 D., et al. (2020). From FAANG to Fork: Application of Highly Annotated Genomes to  
1131 Improve Farmed Animal Production. (doi: 10.20944/preprints202010.0118.v1).  
1132 *Preprints*. doi:10.20944/preprints202010.0118.v1.
- 1133 Colon, S., Page-Mccaw, P., and Bhave, G. (2017). Role of hypohalous acids in basement  
1134 membrane homeostasis. *Antioxidants Redox Signal.* 27, 839–854.  
1135 doi:10.1089/ars.2017.7245.
- 1136 Corces, M. R., Trevino, A. E., Hamilton, E. G., Greenside, P. G., Sinnott-Armstrong, N. A.,  
1137 Vesuna, S., et al. (2017). An improved ATAC-seq protocol reduces background and  
1138 enables interrogation of frozen tissues. *Nat. Methods* 14, 959–962.  
1139 doi:10.1038/nmeth.4396.
- 1140 Edinburgh, U. of (2020). Edinburgh Compute and Data Facility. Available at:  
1141 <https://www.ed.ac.uk/is/research-computing-service> [Accessed July 6, 2020].
- 1142 Edsgård, D., Iglesias, M. J., Reilly, S.-J., Hamsten, A., Tornvall, P., Odeberg, J., et al.  
1143 (2016). GeneiASE: Detection of condition-dependent and static allele-specific  
1144 expression from RNA-seq data without haplotype information. *Sci. Rep.* 6, 21134.  
1145 doi:10.1038/srep21134.
- 1146 Estany, J., Ros-Freixedes, R., Tor, M., and Pena, R. N. (2017). TRIENNIAL GROWTH AND  
1147 DEVELOPMENT SYMPOSIUM: Genetics and breeding for intramuscular fat and oleic  
1148 acid content in pigs1. *J. Anim. Sci.* 95, 2261–2271. doi:10.2527/jas.2016.1108.
- 1149 Ewels, P., Magnusson, M., Lundin, S., and Käller, M. (2016). MultiQC: Summarize analysis  
1150 results for multiple tools and samples in a single report. *Bioinformatics* 32, 3047–3048.  
1151 doi:10.1093/bioinformatics/btw354.
- 1152 Felicioni, F., Pereira, A. D., Caldeira-Brant, A. L., Santos, T. G., Paula, T. M. D. D.,  
1153 Magnabosco, D., et al. (2020). Postnatal development of skeletal muscle in pigs with  
1154 intrauterine growth restriction: morphofunctional phenotype and molecular mechanisms.  
1155 *J. Anat.* 236, 840–853. doi:10.1111/joa.13152.
- 1156 Foissac, S., Djebali, S., Munyard, K., Vialaneix, N., Rau, A., Muret, K., et al. (2019). Multi-  
1157 species annotation of transcriptome and chromatin structure in domesticated animals.  
1158 *BMC Biol.* 17, 108. doi:10.1186/s12915-019-0726-5.
- 1159 Fornes, O., Castro-Mondragon, J. A., Khan, A., Van Der Lee, R., Zhang, X., Richmond, P.  
1160 A., et al. (2020). JASPAR 2020: Update of the open-Access database of transcription  
1161 factor binding profiles. *Nucleic Acids Res.* 48, D87–D92. doi:10.1093/nar/gkz1001.

- 1162 Freeman, T. C., Ivens, A., Baillie, J. K., Beraldi, D., Barnett, M. W., Dorward, D., et al.  
1163 (2012). A gene expression atlas of the domestic pig. *BMC Biol.* 10, 90.  
1164 doi:10.1186/1741-7007-10-90.
- 1165 Halstead, M. M., Kern, C., Saelao, P., Chanthavixay, G., Wang, Y., Delany, M. E., et al.  
1166 (2020a). Systematic alteration of ATAC-seq for profiling open chromatin in  
1167 cryopreserved nuclei preparations from livestock tissues. *Sci. Rep.* 10, 5230.  
1168 doi:10.1038/s41598-020-61678-9.
- 1169 Halstead, M. M., Kern, C., Saelao, P., Wang, Y., Chanthavixay, G., Medrano, J. F., et al.  
1170 (2020b). A comparative analysis of chromatin accessibility in cattle, pig, and mouse  
1171 tissues. *bioRxiv*, 2020.08.13.249870. doi:10.1101/2020.08.13.249870.
- 1172 Halstead, M. M., Ma, X., Zhou, C., Schultz, R. M., and Ross, P. J. (2020c). Chromatin  
1173 remodeling in bovine embryos indicates species-specific regulation of genome  
1174 activation. *Nat. Commun.* 11, 1–16. doi:10.1038/s41467-020-18508-3.
- 1175 Han, K., Ren, R., Cao, J., Zhao, S., and Yu, M. (2019). Genome-Wide Identification of  
1176 Histone Modifications Involved in Placental Development in Pigs . *Front. Genet.* 10,  
1177 277.
- 1178 Harries, L. W., Pilling, L. C., Hernandez, L. D. G., Bradley-Smith, R., Henley, W., Singleton,  
1179 A. B., et al. (2012). CCAAT-enhancer-binding protein-beta expression in vivo is  
1180 associated with muscle strength. *Aging Cell* 11, 262–268. doi:10.1111/j.1474-  
1181 9726.2011.00782.x.
- 1182 Harrison, P. W., Fan, J., Richardson, D., Clarke, L., Zerbino, D., Cochrane, G., et al. (2018).  
1183 FAANG, establishing metadata standards, validation and best practices for the farmed  
1184 and companion animal community. *Anim. Genet.* 49, 520–526. doi:10.1111/age.12736.
- 1185 Hickey, J. M., Bruce, C., Whitelaw, A., and Gorjanc, G. (2016). Promotion of alleles by  
1186 genome editing in livestock breeding programmes. *J. Anim. Breed. Genet.* 133, 83–84.  
1187 doi:10.1111/jbg.12206.
- 1188 Jenko, J., Gorjanc, G., Cleveland, M. A., Varshney, R. K., Whitelaw, C. B. A., Woolliams, J.  
1189 A., et al. (2015). Potential of promotion of alleles by genome editing to improve  
1190 quantitative traits in livestock breeding programs. *Genet. Sel. Evol.* 47, 55.  
1191 doi:10.1186/s12711-015-0135-3.
- 1192 John M. Gaspar (2020). Genrich: detecting sites of genomic enrichment. Available at:  
1193 <https://github.com/jsh58/Genrich>.
- 1194 Johnsson, M., Gaynor, R. C., Jenko, J., Gorjanc, G., de Koning, D.-J., and Hickey, J. M.  
1195 (2019). Removal of alleles by genome editing (RAGE) against deleterious load. *Genet.*  
1196 *Sel. Evol.* 51, 14. doi:10.1186/s12711-019-0456-8.
- 1197 Kaul, S., Blackford, J. A., Chen, J., Ogryzko, V. V., and Simons, S. S. (2000). Properties of  
1198 the glucocorticoid modulatory element binding proteins GMEB-1 and -2: Potential new

- 1199 modifiers of glucocorticoid receptor transactivation and members of the family of KDWK  
1200 proteins. *Mol. Endocrinol.* 14, 1010–1027. doi:10.1210/mend.14.7.0494.
- 1201 Kim, D., Langmead, B., and Salzberg, S. L. (2015). HISAT: a fast spliced aligner with low  
1202 memory requirements. *Nat. Methods* 12, 357–360. doi:10.1038/nmeth.3317.
- 1203 Kuleshov, M. V, Jones, M. R., Rouillard, A. D., Fernandez, N. F., Duan, Q., Wang, Z., et al.  
1204 (2016). Enrichr: a comprehensive gene set enrichment analysis web server 2016  
1205 update. *Nucleic Acids Res.* 44, W90-7. doi:10.1093/nar/gkw377.
- 1206 Lawrence, M., Huber, W., Pagès, H., Aboyoun, P., Carlson, M., Gentleman, R., et al. (2013).  
1207 Software for Computing and Annotating Genomic Ranges. *PLoS Comput. Biol.* 9,  
1208 e1003118–e1003118. doi:10.1371/journal.pcbi.1003118.
- 1209 Lê, S., Josse, J., and Husson, F. (2008). FactoMineR : An R Package for Multivariate  
1210 Analysis. *J. Stat. Softw.* 25, 253–258. doi:10.18637/jss.v025.i01.
- 1211 Lehnert, S. A., Reverter, A., Byrne, K. A., Wang, Y., Natrass, G. S., Hudson, N. J., et al.  
1212 (2007). Gene expression studies of developing bovine longissimus muscle from two  
1213 different beef cattle breeds. *BMC Dev. Biol.* 7, 95. doi:10.1186/1471-213X-7-95.
- 1214 Li, H. (2011). A statistical framework for SNP calling, mutation discovery, association  
1215 mapping and population genetical parameter estimation from sequencing data.  
1216 *Bioinformatics* 27, 2987–93. doi:10.1093/bioinformatics/btr509.
- 1217 Li, H., Handsaker, B., Wysoker, A., Fennell, T., Ruan, J., Homer, N., et al. (2009). The  
1218 Sequence Alignment/Map format and SAMtools. *Bioinformatics* 25, 2078–2079.  
1219 doi:10.1093/bioinformatics/btp352.
- 1220 Li, Y., Li, B., Yang, M., Han, H., Chen, T., Wei, Q., et al. (2020). Genome-Wide Association  
1221 Study and Fine Mapping Reveals Candidate Genes for Birth Weight of Yorkshire and  
1222 Landrace Pigs . *Front. Genet.* 11, 183.
- 1223 Li, Z., Schulz, M. H., Look, T., Begemann, M., Zenke, M., and Costa, I. G. (2019).  
1224 Identification of transcription factor binding sites using ATAC-seq. *Genome Biol.* 20, 1–  
1225 21. doi:10.1186/s13059-019-1642-2.
- 1226 Lim, K. S., Lee, K. T., Park, J. E., Chung, W. H., Jang, G. W., Choi, B. H., et al. (2017).  
1227 Identification of differentially expressed genes in longissimus muscle of pigs with high  
1228 and low intramuscular fat content using RNA sequencing. *Anim. Genet.* 48, 166–174.  
1229 doi:10.1111/age.12518.
- 1230 Liu, L., Leng, L., Liu, C., Lu, C., Yuan, Y., Wu, L., et al. (2019). An integrated chromatin  
1231 accessibility and transcriptome landscape of human pre-implantation embryos. *Nat.*  
1232 *Commun.* 10, 364. doi:10.1038/s41467-018-08244-0.
- 1233 Love, M. I., Huber, W., and Anders, S. (2014). Moderated estimation of fold change and  
1234 dispersion for RNA-seq data with DESeq2. *Genome Biol.* 15, 550. doi:10.1186/s13059-  
1235 014-0550-8.

- 1236 Martin, M., Patterson, M., Garg, S., O Fischer, S., Pisanti, N., Klau, G., et al. (2016).  
1237       WhatsHap: fast and accurate read-based phasing. *bioRxiv*, 085050.  
1238       doi:10.1101/085050.
- 1239 McKenna, A., Hanna, M., Banks, E., Sivachenko, A., Cibulskis, K., Kernytzky, A., et al.  
1240       (2010). The Genome Analysis Toolkit: a MapReduce framework for analyzing next-  
1241       generation DNA sequencing data. *Genome Res.* 20. doi:10.1101/gr.107524.110.
- 1242 Narasimhan, V., Danecek, P., Scally, A., Xue, Y., Tyler-Smith, C., and Durbin, R. Genetics  
1243       and population analysis BCFtools/RoH: a hidden Markov model approach for detecting  
1244       autozygosity from next-generation sequencing data. doi:10.1093/bioinformatics/btw044.
- 1245 Oksbjerg, N., Gondret, F., and Vestergaard, M. (2004). Basic principles of muscle  
1246       development and growth in meat-producing mammals as affected by the insulin-like  
1247       growth factor (IGF) system. *Domest. Anim. Endocrinol.* 27, 219–240.  
1248       doi:<https://doi.org/10.1016/j.domaniend.2004.06.007>.
- 1249 Pai, A. A., Pritchard, J. K., and Gilad, Y. (2015). The Genetic and Mechanistic Basis for  
1250       Variation in Gene Regulation. 11, e1004857. doi:10.1371/journal.pgen.1004857.
- 1251 Pardo, C. E., Kreuzer, M., and Bee, G. (2013). Effect of average litter weight in pigs on  
1252       growth performance, carcass characteristics and meat quality of the offspring as  
1253       depending on birth weight. *animal* 7, 1884–1892. doi:DOI:  
1254       10.1017/S1751731113001419.
- 1255 Patterson, M. D., Marschall, T., Pisanti, N., Van Iersel, L., Stougie, L., Klau, G. W., et al.  
1256       (2015). WhatsHap: Weighted Haplotype Assembly for Future-Generation Sequencing  
1257       Reads. *J. Comput. Biol.* 22, 498–509. doi:10.1089/cmb.2014.0157.
- 1258 Quinlan, A. R., and Hall, I. M. (2010). BEDTools: A flexible suite of utilities for comparing  
1259       genomic features. *Bioinformatics* 26, 841–842. doi:10.1093/bioinformatics/btq033.
- 1260 R Core Team (2017). R: A language and environment for statistical computing. *R Found.*  
1261       *Stat. Comput.* Available at: <https://www.r-project.org/>.
- 1262 Rehfeldt, C., and Kuhn, G. (2006). Consequences of birth weight for postnatal growth  
1263       performance and carcass quality in pigs as related to myogenesis1. *J. Anim. Sci.* 84,  
1264       E113–E123. doi:10.2527/2006.8413\_supplE113x.
- 1265 Roelofs, S., Godding, L., de Haan, J. R., van der Staay, F. J., and Nordquist, R. E. (2019).  
1266       Effects of parity and litter size on cortisol measures in commercially housed sows and  
1267       their offspring. *Physiol. Behav.* 201, 83–90.  
1268       doi:<https://doi.org/10.1016/j.physbeh.2018.12.014>.
- 1269 Rudar, M., Fiorotto, M. L., and Davis, T. A. (2019). Regulation of Muscle Growth in Early  
1270       Postnatal Life in a Swine Model. *Annu. Rev. Anim. Biosci.* 7, 309–335.  
1271       doi:10.1146/annurev-animal-020518-115130.
- 1272 Saatchi, M., Schnabel, R. D., Taylor, J. F., and Garrick, D. J. (2014). Large-effect pleiotropic

- 1273 or closely linked QTL segregate within and across ten US cattle breeds. *BMC*  
1274 *Genomics* 15, 442. doi:10.1186/1471-2164-15-442.
- 1275 Salavati, M., Bush, S. J. S. J., Palma-Vera, S., McCulloch, M. E. B. M. E. B., Hume, D. A. D.  
1276 A., and Clark, E. L. E. L. (2019). Elimination of Reference Mapping Bias Reveals  
1277 Robust Immune Related Allele-Specific Expression in Crossbred Sheep. *Front. Genet.*  
1278 10, 619122. doi:10.3389/fgene.2019.00863.
- 1279 Sang, Y., Rowland, R. R. R., Hesse, R. A., and Blecha, F. (2010). Differential expression  
1280 and activity of the porcine type I interferon family. *Physiol. Genomics* 42, 248–258.  
1281 doi:10.1152/physiolgenomics.00198.2009.
- 1282 Soneson, C., Love, M. I., and Robinson, M. D. (2016). Differential analyses for RNA-seq:  
1283 Transcript-level estimates improve gene-level inferences [version 2; referees: 2  
1284 approved]. *F1000Research*. doi:10.12688/F1000RESEARCH.7563.2.
- 1285 Stange, K., Miersch, C., Sponder, G., and Röntgen, M. (2020). Low birth weight influences  
1286 the postnatal abundance and characteristics of satellite cell subpopulations in pigs. *Sci.*  
1287 *Rep.* 10, 6149. doi:10.1038/s41598-020-62779-1.
- 1288 Stenhouse, C., Hogg, C. O., and Ashworth, C. J. (2018). Associations between fetal size,  
1289 sex and both proliferation and apoptosis at the porcine feto-maternal interface. *Placenta*  
1290 70, 15–24. doi:10.1016/j.placenta.2018.08.006.
- 1291 Summers, K. M., Bush, S. J., Wu, C., Su, A. I., Muriuki, C., Clark, E. L., et al. (2020).  
1292 Functional Annotation of the Transcriptome of the Pig, *Sus scrofa*, Based Upon  
1293 Network Analysis of an RNAseq Transcriptional Atlas. *Front. Genet.* 10, 1355.
- 1294 Thorvaldsdóttir, H., Robinson, J. T., and Mesirov, J. P. (2013). Integrative Genomics Viewer  
1295 (IGV): High-performance genomics data visualization and exploration. *Brief. Bioinform.*  
1296 14, 178–192. doi:10.1093/bib/bbs017.
- 1297 Thurman, R. E., Rynes, E., Humbert, R., Vierstra, J., Maurano, M. T., Haugen, E., et al.  
1298 (2012). The accessible chromatin landscape of the human genome. *Nature* 489, 75–82.  
1299 doi:10.1038/nature11232.
- 1300 Tyler, T. W., and Girke, T. (2016). systemPipeR: NGS workflow and report generation  
1301 environment. *BMC Bioinformatics* 17, 388. doi:10.1186/s12859-016-1241-0.
- 1302 van de Geijn, B., McVicker, G., Gilad, Y., and Pritchard, J. K. (2015). WASP: allele-specific  
1303 software for robust molecular quantitative trait locus discovery. *Nat. Methods* 12, 1061–  
1304 1063. doi:10.1038/nmeth.3582.
- 1305 Van der Auwera, G. A., Carneiro, M. O., Hartl, C., Poplin, R., Del Angel, G., Levy-  
1306 Moonshine, A., et al. (2013). From FastQ data to high confidence variant calls: the  
1307 Genome Analysis Toolkit best practices pipeline. *Curr. Protoc. Bioinforma.* 43, 11.10.1-  
1308 33. doi:10.1002/0471250953.bi1110s43.
- 1309 Venables, W. N., and Ripley, B. D. (2002). *Modern Applied Statistics with S*. Fourth. New

- 1310 York: Springer Available at: <http://www.stats.ox.ac.uk/pub/MASS4/>.
- 1311 Wang, X., Liu, X., Deng, D., Yu, M., and Li, X. (2016). Genetic determinants of pig birth  
1312 weight variability. *BMC Genet.* 17, S15. doi:10.1186/s12863-015-0309-6.
- 1313 Warr, A., Affara, N., Aken, B., Beiki, H., Bickhart, D. M., Billis, K., et al. (2020). An improved  
1314 pig reference genome sequence to enable pig genetics and genomics research.  
1315 *Gigascience* 9, 1–14. doi:10.1093/gigascience/giaa051.
- 1316 Weatherall, E. L., Avilkina, V., Cortes-Araya, Y., Dan-Jumbo, S., Stenhouse, C., Donadeu, F.  
1317 X., et al. (2020). Differentiation Potential of Mesenchymal Stem/Stromal Cells Is Altered  
1318 by Intrauterine Growth Restriction . *Front. Vet. Sci.* 7, 809.
- 1319 Weber, F. E., VAUGHAN, K. T., REINACH, F. C., and FISCHMAN, D. A. (1993). Complete  
1320 sequence of human fast-type and slow-type muscle myosin-binding-protein C (MyBP-  
1321 C): Differential expression, conserved domain structure and chromosome assignment.  
1322 *Eur. J. Biochem.* 216, 661–669. doi:10.1111/j.1432-1033.1993.tb18186.x.
- 1323 Wigmore, P. M., and Stickland, N. C. (1983). Muscle development in large and small pig  
1324 fetuses. *J. Anat.* 137, 235–45.
- 1325 Wong, P. B., Wiley, E. O., Johnson, W. E., Ryder, O. A., O'Brien, S. J., Haussler, D., et al.  
1326 (2012). Tissue sampling methods and standards for vertebrate genomics. *Gigascience*  
1327 1, 8. doi:10.1186/2047-217X-1-8.
- 1328 Wu, J., Xu, J., Liu, B., Yao, G., Wang, P., Lin, Z., et al. (2018). Chromatin analysis in human  
1329 early development reveals epigenetic transition during ZGA. *Nature* 557.  
1330 doi:10.1038/s41586-018-0080-8.
- 1331 Xiang, R., Berg, I. van den, MacLeod, I. M., Hayes, B. J., Prowse-Wilkins, C. P., Wang, M.,  
1332 et al. (2019). Quantifying the contribution of sequence variants with regulatory and  
1333 evolutionary significance to 34 bovine complex traits. *Proc. Natl. Acad. Sci.* 116, 19398  
1334 LP – 19408. doi:10.1073/pnas.1904159116.
- 1335 Xue, H.-L. L., and Zhou, Z.-X. X. (2006). Effects of the MyoG Gene on the Partial Growth  
1336 Traits in Pigs. *Acta Genet. Sin.* 33, 992–997. doi:10.1016/S0379-4172(06)60134-0.
- 1337 Yan, F., Powell, D. R., Curtis, D. J., and Wong, N. C. (2020). From reads to insight: a  
1338 hitchhiker's guide to ATAC-seq data analysis. *Genome Biol.* 21, 22.  
1339 doi:10.1186/s13059-020-1929-3.
- 1340 Yan, L., Guo, H., Hu, B., Li, R., Yong, J., Zhao, Y., et al. (2016). Epigenomic Landscape of  
1341 Human Fetal Brain, Heart, and Liver. *J. Biol. Chem.* 291, 4386–4398.  
1342 doi:10.1074/jbc.M115.672931.
- 1343 Yang, X. R., Yu, B., Mao, X. B., Zheng, P., He, J., Yu, J., et al. (2015). Lean and obese pig  
1344 breeds exhibit differences in prenatal gene expression profiles of muscle development.  
1345 *Animal* 9, 28–34. doi:DOI: 10.1017/S1751731114002316.
- 1346 Yue, J., Hou, X., Liu, X., Wang, L., Gao, H., Zhao, F., et al. (2021). The landscape of

1347 chromatin accessibility in skeletal muscle during embryonic development in pigs. *J.*  
1348 *Anim. Sci. Biotechnol.* 12, 1–15. doi:10.1186/s40104-021-00577-z.  
1349 Zhao, X., Mo, D., Li, A., Gong, W., Xiao, S., Zhang, Y., et al. (2011). Comparative Analyses  
1350 by Sequencing of Transcriptomes during Skeletal Muscle Development between Pig  
1351 Breeds Differing in Muscle Growth Rate and Fatness. *PLoS One* 6, e19774.  
1352 Zhao, Y., Li, J., Liu, H., Xi, Y., Xue, M., Liu, W., et al. (2015). Dynamic transcriptome profiles  
1353 of skeletal muscle tissue across 11 developmental stages for both Tongcheng and  
1354 Yorkshire pigs. *BMC Genomics* 16, 377. doi:10.1186/s12864-015-1580-7.

1355

## 1356 **Figure Legends**

1357

1358 Figure 1: Flowchart describing the experimental design and samples included in each stage  
1359 of the analysis performed in this study. Colour coding indicates where there are overlaps in  
1360 the analysis performed for each component of the study.

1361

1362 Figure 2 : Genomic track visualisation of the ATAC-Seq and RNA-Seq datasets by presence  
1363 of the signal at gene coordinates of 2 genes *GAPDH* and *MYBPC2*. The normalised  
1364 ATAC-Seq read counts and RNA-Seq TPM counts are shown in teal green and pink tracks  
1365 under the consensus peak calls shown in black boxes. The gene model (purple) and  
1366 respective transcripts(yellow) are chosen from a housekeeping genes A) *GAPDH* and a  
1367 muscle tissue targets genes investigated in this study B) *MYBPC2*. Refer to Supplementary  
1368 Figure S2 for two more genomic tracks from another pair of housekeeping and gene of  
1369 interest.

1370

1371 Figure 3 : Non-linear Multi-dimensional scaling (NMDS) analysis of the ATAC-Seq open  
1372 chromatin consensus set in all samples. The normalised read count for each was used as  
1373 described by (Yan et al., 2020). Samples from different developmental time points are indicated  
1374 by colour and piglet size by shape. Label colours are used to differentiate between  
1375 Cryopreserved nuclei and Frozen tissue library preparation protocols.

1376

1377 Figure 4: Location of ATAC-Seq peaks within genomic features (A) and distance of ATAC-Seq  
1378 peaks from the TSS. The samples are sorted by the developmental timeline (Day 45 to 6  
1379 weeks old from top to bottom). B) The histogram of consensus ATAC-Seq peaks distance to  
1380 TSS from all 24 samples. The cryopreserved nuclei samples are only present in the 6 week  
1381 old group and are labelled as cryo\_nuclei.

1382

1383 Figure 5: Read count frequency and normalised read counts of ATAC-Seq peaks across  
1384 developmental time points. A) Differential peak analysis of ATAC-Seq peaks across time  
1385 points including the piglet size and litter as a fixed variable in the DESeq2 LRT model. The  
1386 significantly differentially expressed peaks (DEP) are plotted in each time point and coloured  
1387 by the piglet size. The line represents the average normalised read counts per time point for  
1388 all DEPs. B) Shows the read count frequency relative to TSS for ATAC-Seq peaks called using  
1389 all the samples from each time point at once.

1390

1391 Figure 6: Mapping of ATAC-Seq peaks at Day 90 of gestation that were: i) specific to small or  
1392 large sized piglets or ii) shared across samples. A) mapping relative to the TSS, B) distribution  
1393 within genomic features and C) distribution of relative to the TSS.

1394

1395 Figure 7: HINT pipeline analysis of the ATAC-Seq dataset for day 90 samples compared  
1396 between large and small piglet size. A) The differential transcription factor activity between  
1397 two piglet sizes at day 90 sorted by the HINT z-score value. The red dots are statistically  
1398 significant (FDR 10%) showing hyperactivity of *GMEB2* in the small size piglets muscle tissues  
1399 along with lowered activity of *TFAP2C*, *HOXD12*, *FOXH1* and *CEBPE* transcription factors  
1400 (higher in the large size piglets). The TF activity in the vicinity of the corresponding motif  
1401 between large and small size piglets are shown in B) for *CEBPE* and C) for *GMEB2*.

1402

1403 Figure 8: Principal Component Analysis (PCA) of gene expression estimates (as TPM) from  
1404 the RNA-Seq data for each sample. The samples cluster according to developmental stage  
1405 with clear separation of neonatal and post-natal samples. D45 = Gestational Day 45; D60 =  
1406 Gestational Day 60; D90 = Gestational Day 90; 1WK = Neonatal 1 week old ;6WK = Juvenile  
1407 6 weeks old.

1408

1409 Figure 9: Differentially expressed genes (RNA-Seq) between large, average and small sized  
1410 piglets at Day 90 of gestation. A) Large vs Small B) Average vs Small C) Average vs Large.  
1411 Differentially expressed genes are shown in red, the  $\log_2FC > 0.1$  in blue and the significance  
1412 threshold as a green line. The ApeGLM shrinkage method was used to normalised the log fold  
1413 change plotted on the x axis. Detailed methodology is described in (Love et al., 2014).

1414

1415 Figure 10: Proximity of ATAC-Seq peaks specific to large (A) and small (B) piglets and  
1416 differentially expressed genes. Differentially expressed genes are marked in green. The x-axis  
1417 (start\_dist) is the distance from the start of the gene model to the start of the ATAC-Seq peak,  
1418 for +ve values the peak is either within the gene or within 10 kb of the 3' end and for -ve values  
1419 the peak is within 10 kb of the 5' end of the gene. The y-axis indicates the width of the peak.



1420 As the y axis represent the width of the peak, the larger the node the wider the ATAC-Seq  
1421 peak.

1422

1423 Figure 11: Genes exhibiting significant allele specific expression in small, average and large  
1424 sized piglets at Day 90 of gestation. A) genes exhibiting allelic imbalance in up to three  
1425 biological replicates for each size of piglet (genes were classified into three groups according  
1426 to whether allelic balance was detected in all three biological replicates: 3= exhibited in large,  
1427 average and small, 2= exhibited in either small and large or average and large, 1= exhibited  
1428 only in one group). The percentage representation (75% to 100 %) of biological replicates for  
1429 the gene exhibiting allelic imbalance is indicated by the transparency of the bars. The genes  
1430 showing ASE in each of the three sizes of piglet are indicated using coloured bars that  
1431 represent the level of allelic imbalance calculated using the Liptak score (and output metric of  
1432 the GeneiASE pipeline). B) Distance of ATAC-Seq peaks, specific to either large or small sized  
1433 piglets, from the TSS of genes showing significant allelic imbalance.

1434

### 1435 **Supplemental Material**

1436

1437 Supplementary Table 1: Weights and crown-rump lengths of all piglets included in the study.  
1438 Supplementary Table 2: Details of components of all buffers used for ATAC-Seq sample  
1439 collection and library preparation.

1440 Supplementary Table 3: Details of the primers (Ad2.x variable index) used for generating each  
1441 ATAC-Seq library. Each sample is barcoded with a different variable index.

1442 Supplementary Table 4: Summary table of RNA-Sequencing and ATAC-Sequencing quality  
1443 control metrics for all samples. 'N/A' indicates that sequencing did not occur for that sample.

1444 Supplementary Table 5: Results of differential expression analysis of large vs average vs small  
1445 piglet sizes at Day 90 of gestation using a DESeq2 glm model. Only genes with FDR < 0.1  
1446 have been included.

1447 Supplementary\_file\_1.zip: The collection of scripts and BED files corresponding to the  
1448 ATAC-Seq peak coordinates for the developmental time points and sizes of piglet at Day 90.

1449 Supplementary\_file\_2.zip: The haplotype specific ORF predictions and corresponding genes  
1450 in small piglets. Modified BED format presented as a tab separated output.

1451 Supplementary\_file3.zip: The transcriptome read-backed phased haplotypes (WhatsHap) for  
1452 all 3 small size piglets from day 90 samples.

1453 Supplementary\_file\_4.zip: The library preparation metadata and sequencing read depth  
1454 metrics of the ATAC-Seq samples (n=24).

1455 Supplementary\_file\_5.zip: The differential peak analysis outputs for timeseries and Day 90  
1456 piglet size comparisons.

1457 Supplementary\_file\_6.zip: GTF track of Day 90 small piglet haplotype blocks phased using an  
1458 RNA-Seq read-back phasing algorithm in the WhatsHap pipeline with fasta files for each  
1459 individual piglet.  
1460

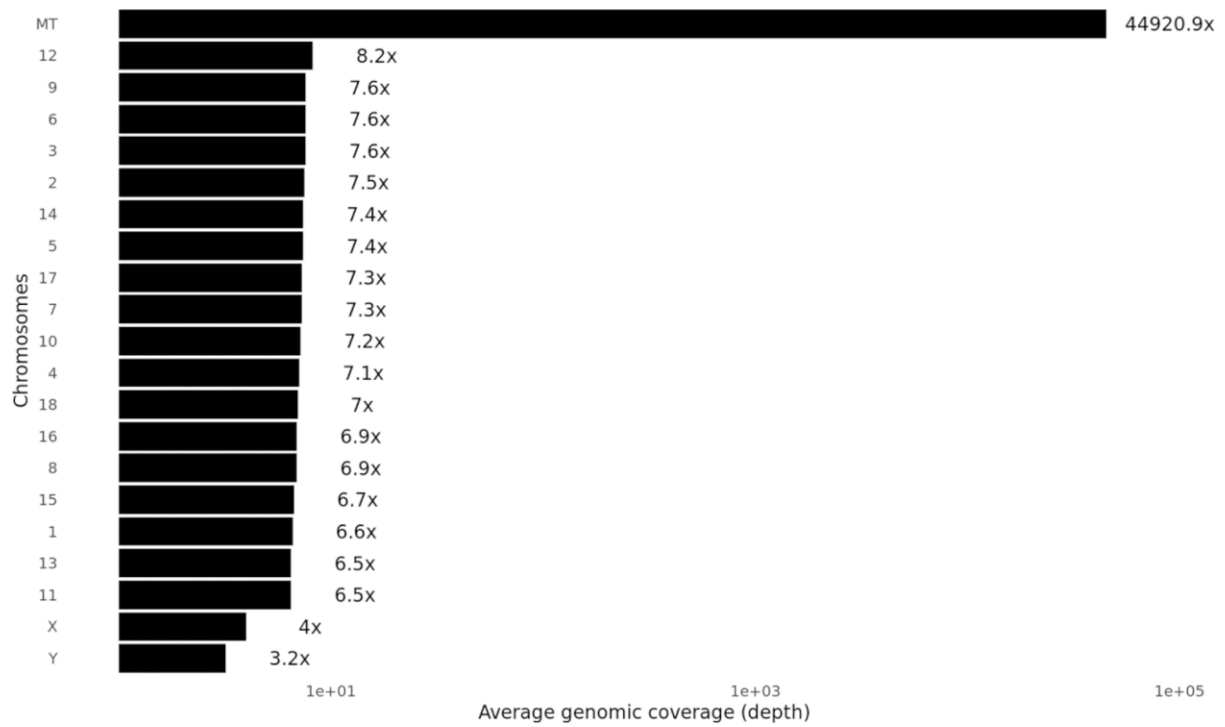

1461

1462 Supplementary Figure S1: Average genomic coverage of the ATAC-Seq dataset by  
1463 chromosome.

1464

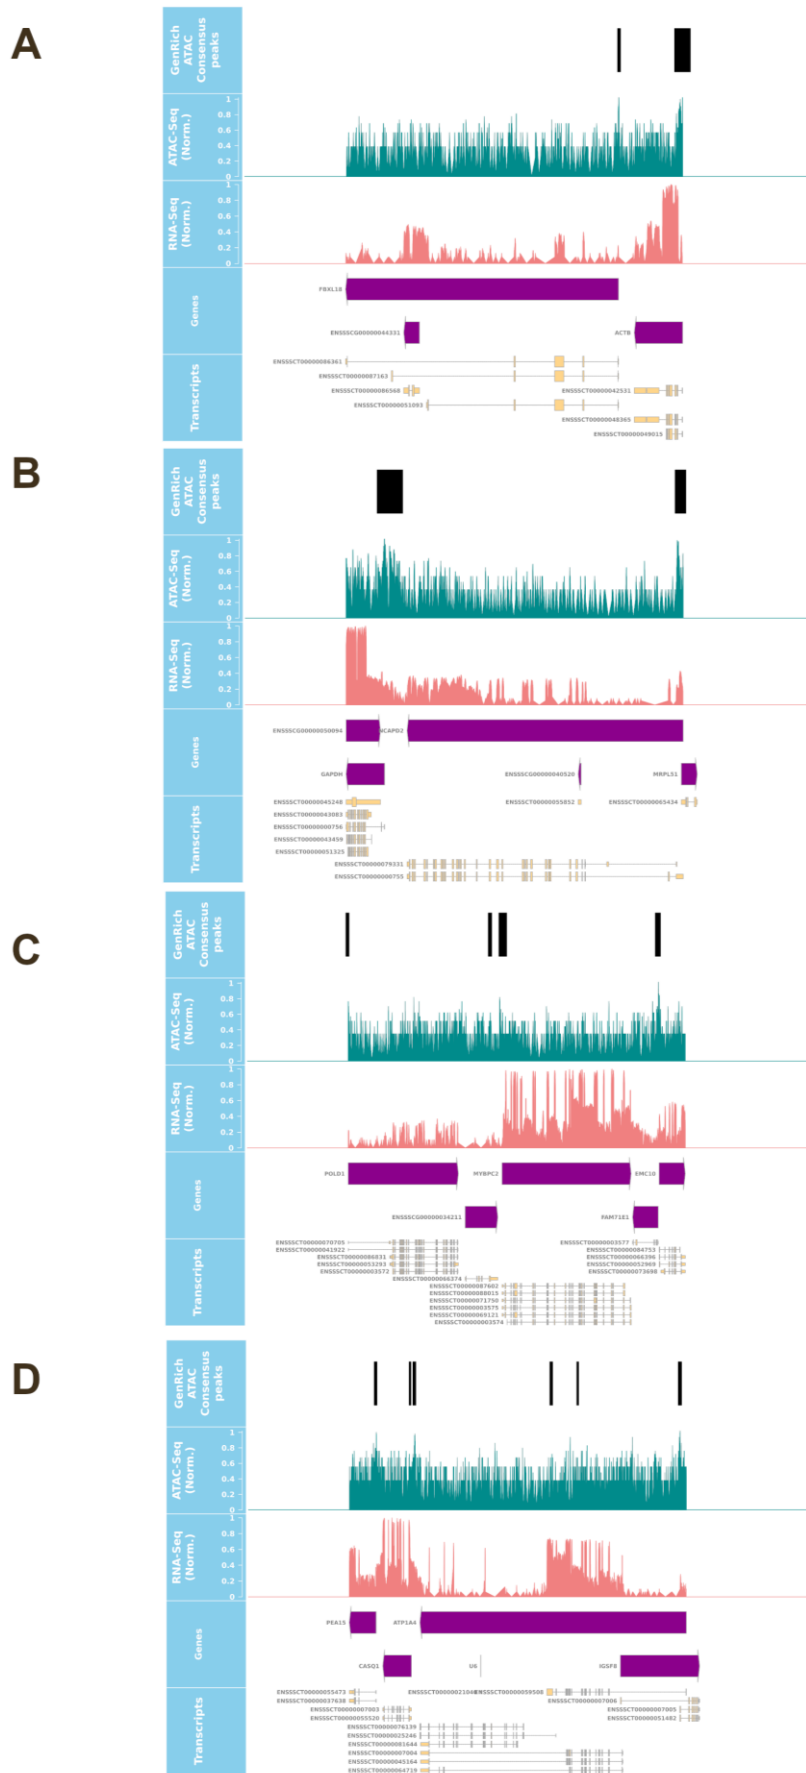

1466 Supplementary Figure S2: Genomic track visualisation of the ATAC-Seq and RNA-Seq  
1467 datasets by presence of the signal at gene coordinates of 2 genes *ACTB*, *GAPDH*, *CASQ1*  
1468 and *MYBPC2*. The normalised ATAC-Seq read counts and RNA-Seq TPM counts are shown  
1469 in teal green and pink tracks under the consensus peak calls shown in black boxes. The gene  
1470 model (purple) and respective transcripts(yellow) are chosen from 2 housekeeping genes A)  
1471 *ACTB* B) *GAPDH* and 2 muscle tissue targets genes investigated in this study C) *CASQ1* and  
1472 D) *MYBPC2*.

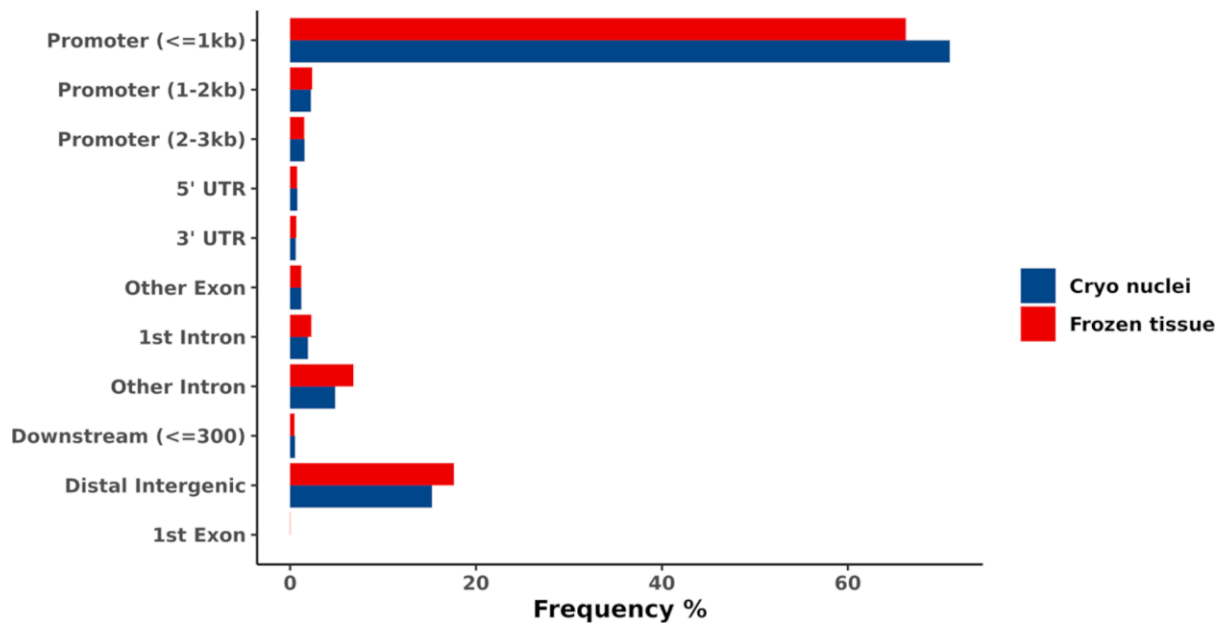

1473  
1474 Supplementary Figure S3: Metrics to compare ATAC-Seq peaks in libraries prepared from  
1475 either cryopreserved nuclei from fresh tissue (blue) or from flash frozen tissue (red). Both sets  
1476 of samples were collected from the semitendinosus muscle from the same six-week-old  
1477 piglets.

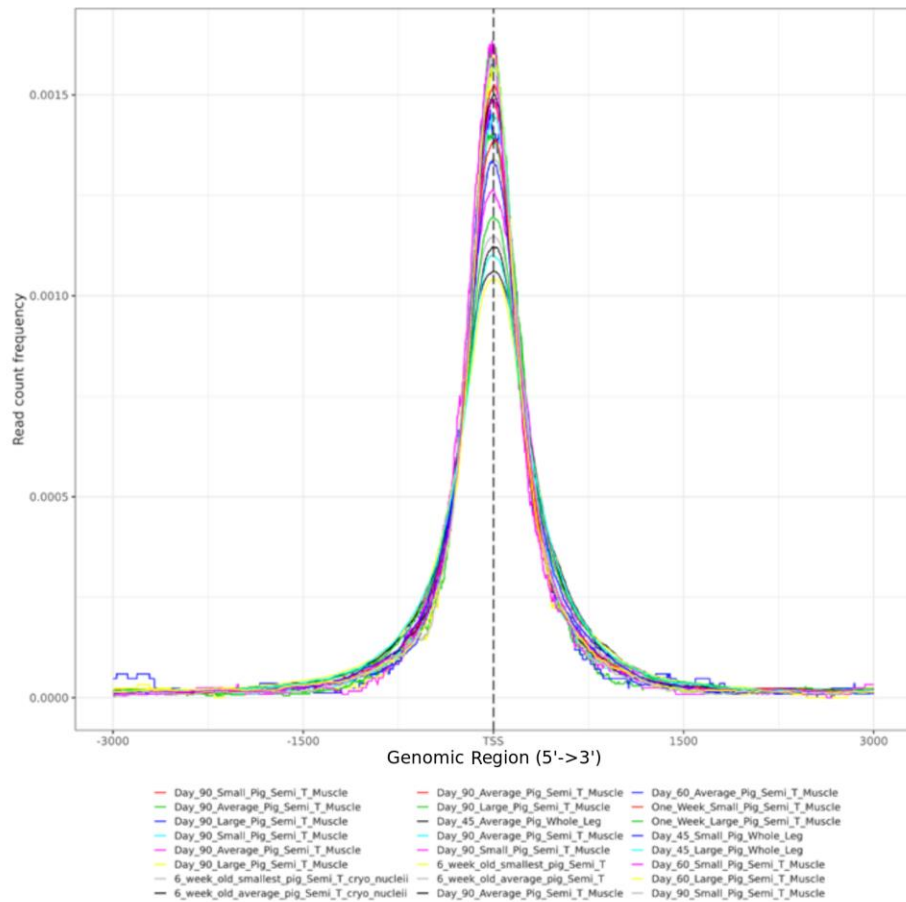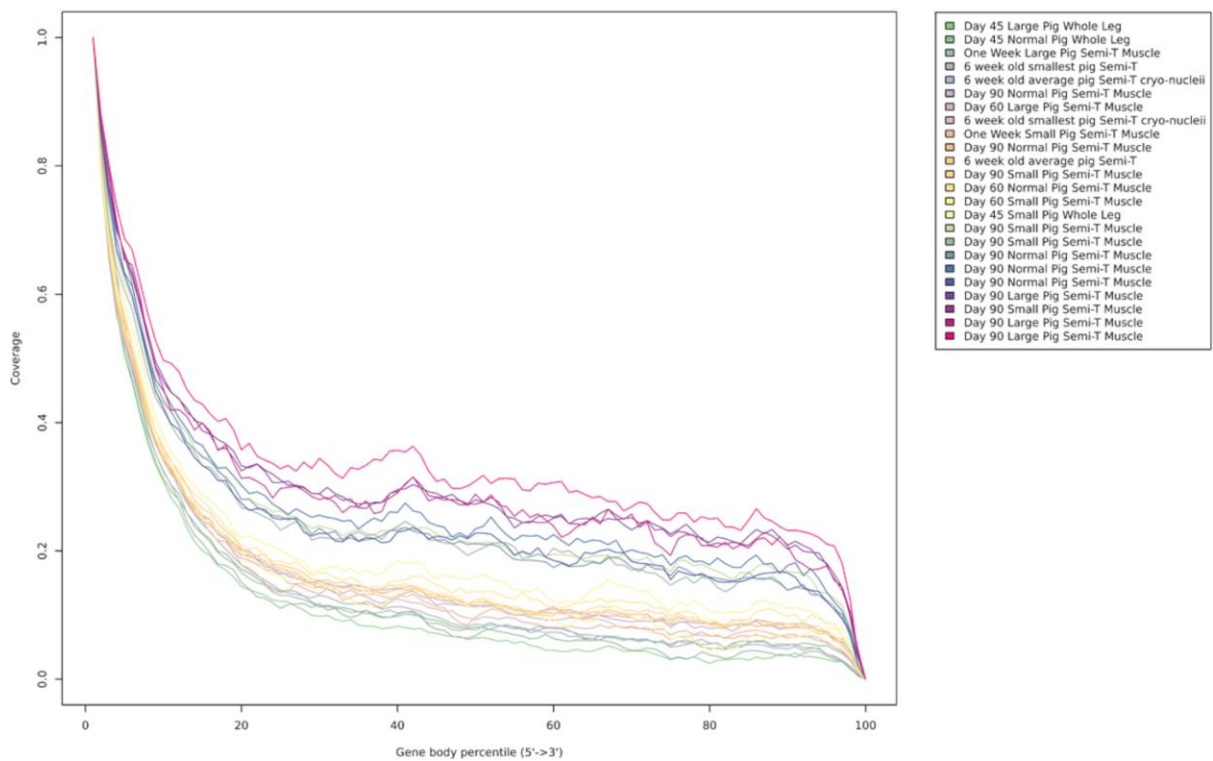

1478

1479 Supplementary Figure S4: Open chromatin peak distribution from the ATAC-Seq libraries  
1480 generated for all 24 muscle tissue samples. The read distribution was calculated based on the  
1481 distance from the centre of the ATAC-Seq peak (highest read count position) to TSSs.

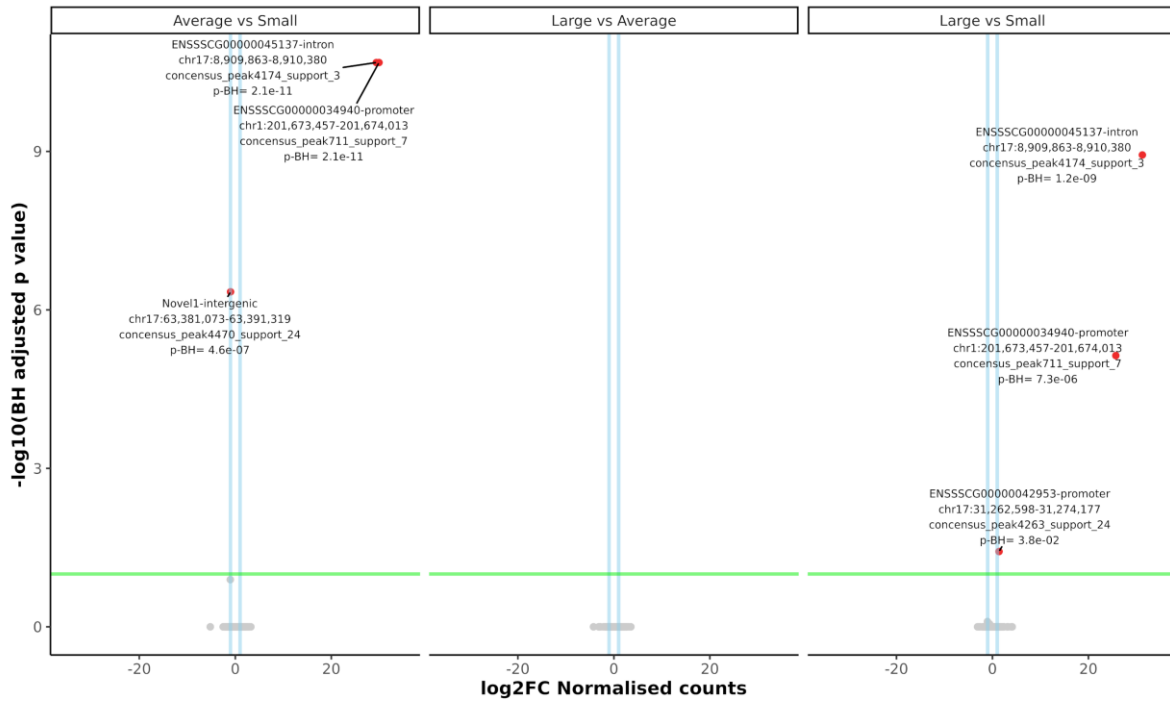

1482

1483 Supplementary Figure S5: Differential peaks analysis of the consensus set of ATAC-Seq  
1484 peaks comparing the three (small, average and large) piglet sizes at day 90. The peaks above  
1485 the FDR 10% threshold (green horizontal line) are marked in red and annotated by their  
1486 corresponding annotation as well as genomic coordinate.

**A**

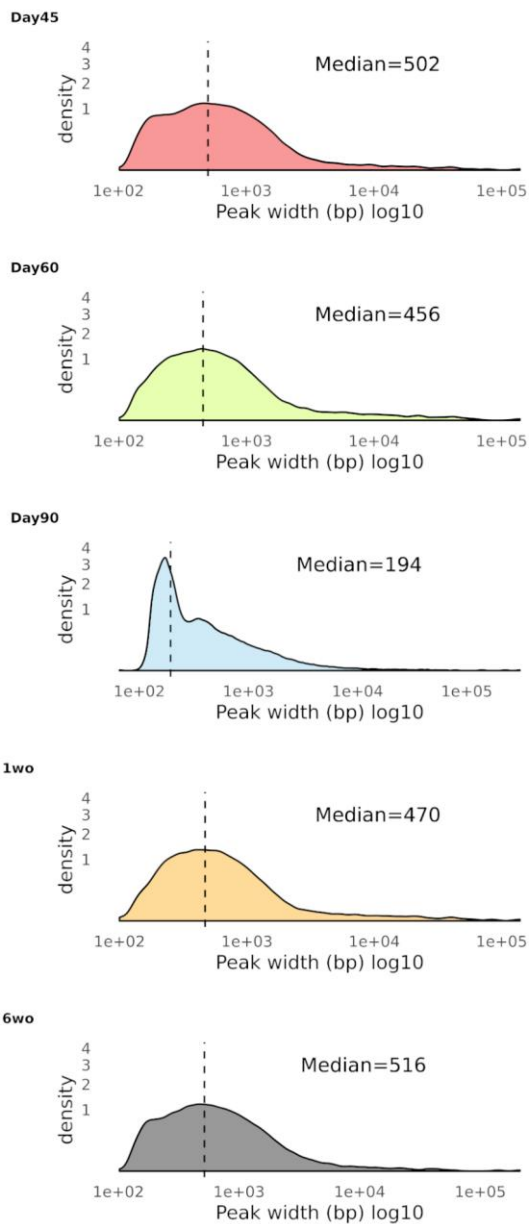

**B**

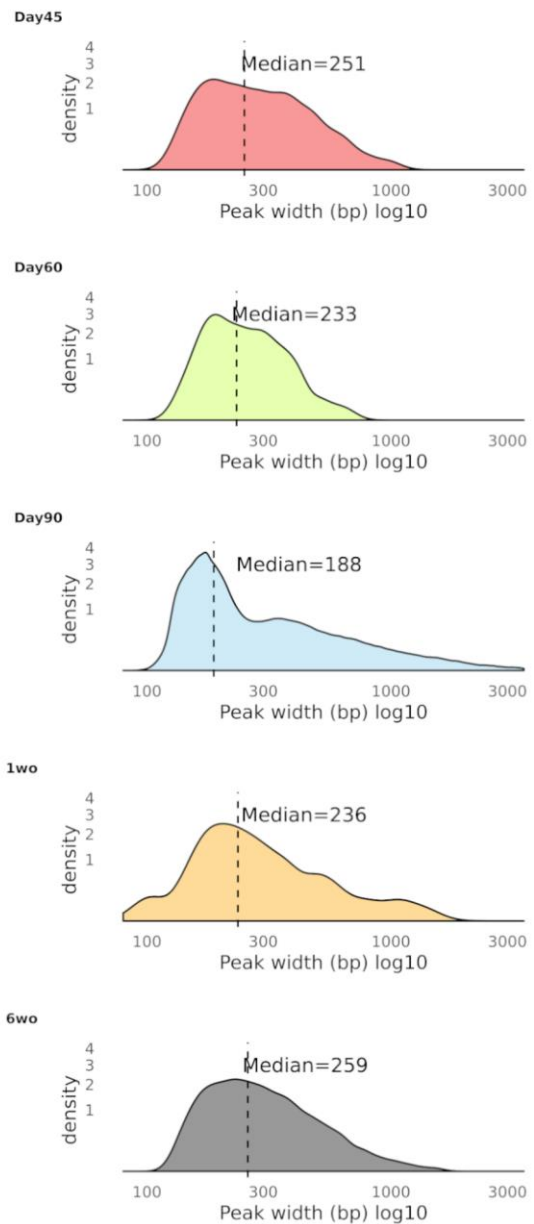

1487

1488 Supplementary Figure S6: The width distribution of ATAC-Seq peaks at each developmental  
1489 time point. The dotted line represents the median width for each time point. A) Width of  
1490 ATAC-Seq peaks shared across all time points, B) Width of ATAC-Seq peaks that were  
1491 specific to each time point. wo stands for week old.



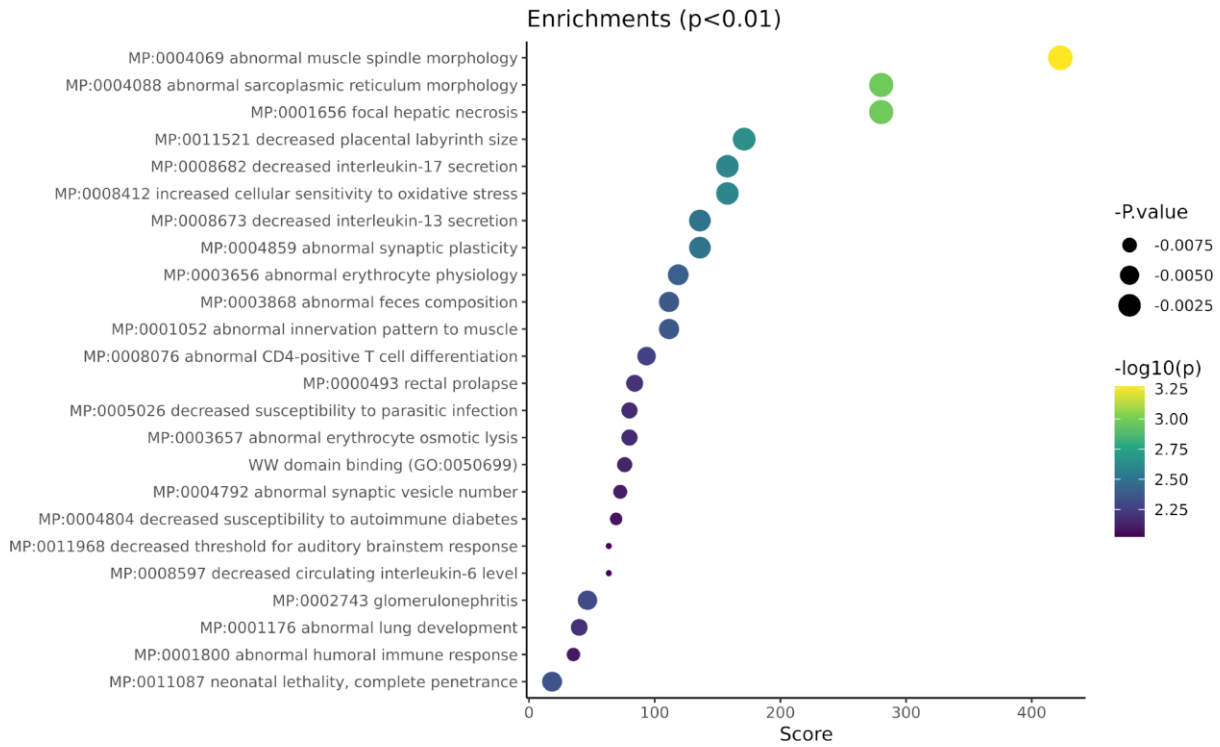

1492

1493 Supplementary Figure S7: Enrichment analysis of the differentially expressed genes (n=89)

1494 between the large vs small piglet size using EnrichR databases (MPI mammalian phenotypes

1495 and GO biological processes). The pathways were sorted by the contribution score (x-axis)

1496 and the smallest p value (colour and size).

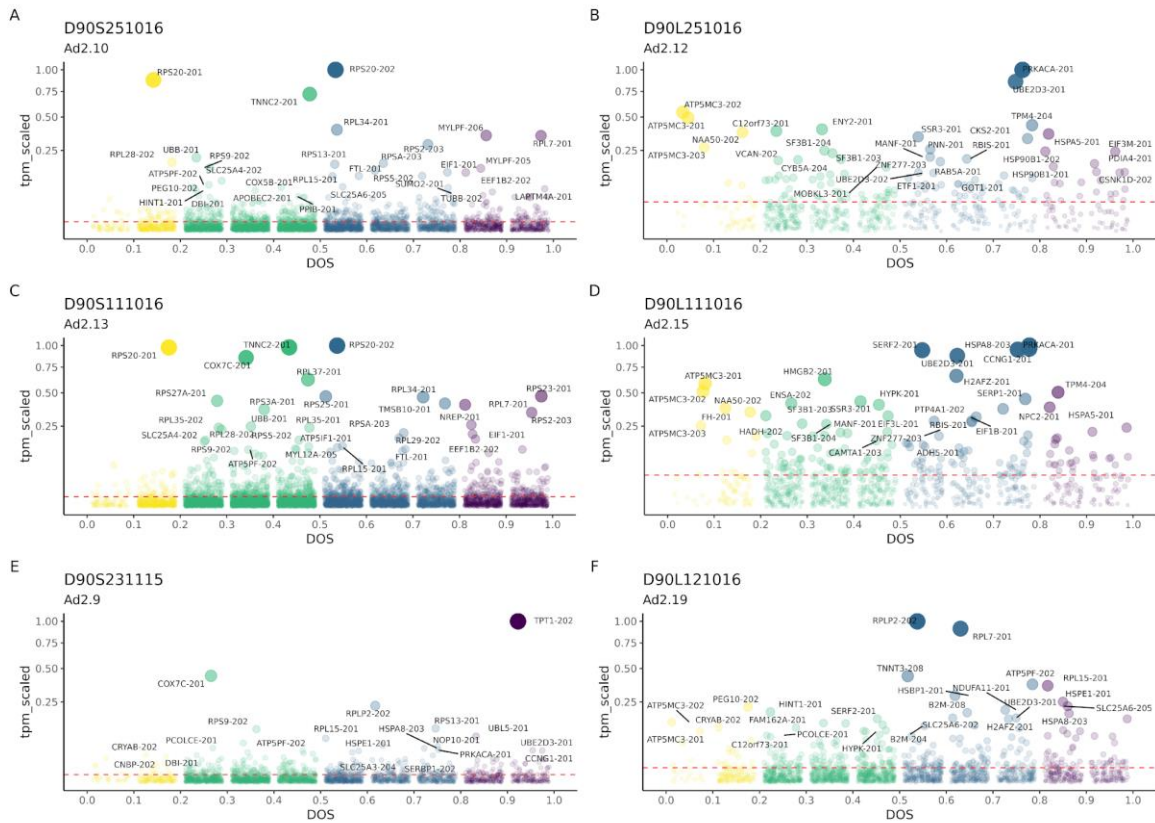

1497

1498 Supplementary Figure S8: Overlay of DNA openness score (DOS) and transcript expression  
1499 level (as TPM) in large and small sized piglets from three litters: A & B) Small and large piglets  
1500 from litter 251016. C & D) small and large piglets from litter 111016. E) small piglet from  
1501 231115 (no RNA-Seq sample from a large piglet was available for this litter from comparison)  
1502 and F) large piglet from 121016 (no RNA-Seq sample from a small piglet was available for this  
1503 litter from comparison). Dots are coloured by k means cluster grouping of high(0.8-1), medium  
1504 (0.5-0.8), low (0.2-0.5) and minimal (0-0.2) chromatin accessibility based on the DOS. The  
1505 sizes of the dots are scaled according to level of expression (scaled TPM 0-1). Colours  
1506 represent DOS binned (10 bins) categories of 0.8-1 (purple - high DOS), 0.5-0.8 (blue -  
1507 medium DOS), 0.2-0.5 (green – low DOS) and 0-0.2 in yellow (minimal DOS). The average  
1508 (mean) expression of transcripts in each sample marked by a red dotted line. The average  
1509 TPM (red dotted line) across each sample was tested between large and small size piglets  
1510 and showed significantly higher values in the large piglets.

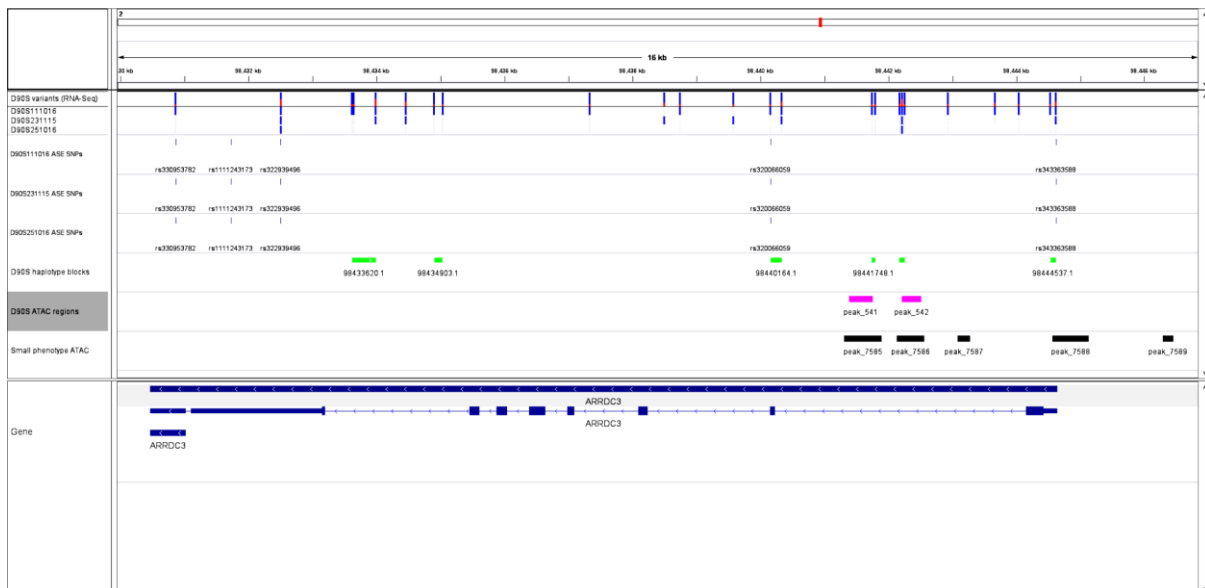

1511  
1512 Supplementary Figure S9: Genomic track visualisation of the genomic regions including gene  
1513 *ARRDC3*. Variants called using RNA-Seq data with read-backed haplotype blocks in the small  
1514 sized piglets, and the corresponding open chromatin regions (ATAC-Seq peaks), are shown.  
1515 The top four tracks show variants in dark blue (one consensus genotype and three allele-  
1516 specific positive variants in each piglet) and the haplotype block in green. ATAC-Seq peaks  
1517 specific to small sized piglets are shown in pink and shared ATAC-Seq peaks in black.

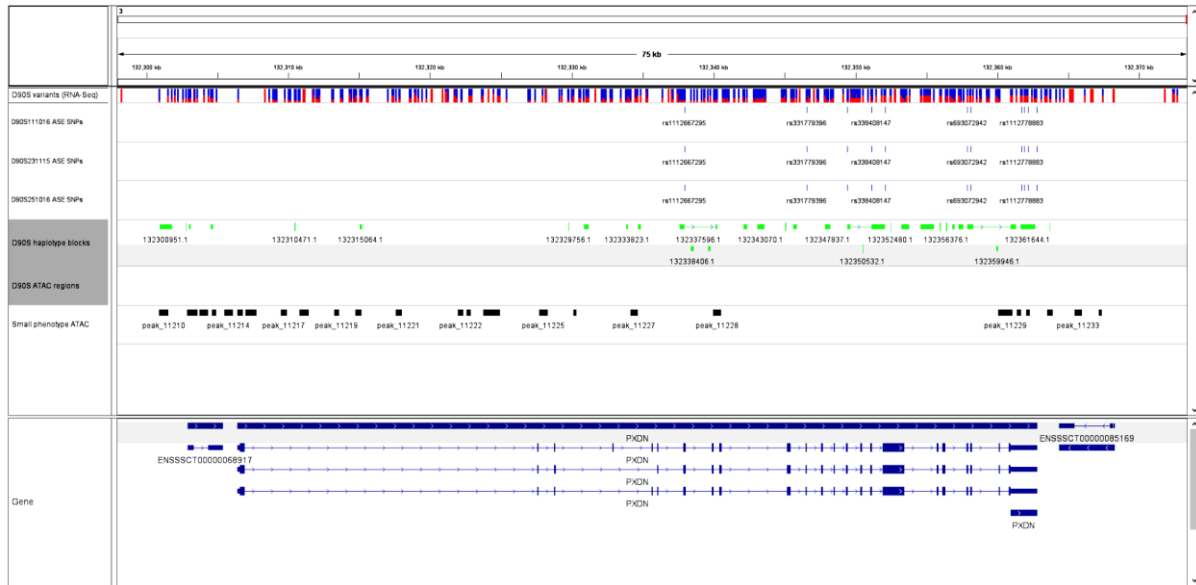

1518

1519 Supplementary Figure S10: Genomic track visualisation of the genomic region including gene  
1520 *PXDN*. Variants called using RNA-Seq data with read-backed haplotype blocks in the small  
1521 sized piglets, and the corresponding open chromatin regions (ATAC-Seq peaks), are shown.  
1522 The top four tracks show variants in dark blue (one consensus genotype track and three  
1523 separate tracks for allele-specific positive variants in each of the three piglets) and the  
1524 haplotype block in green. ATAC-Seq peaks specific to small sized piglets are shown in pink  
1525 and shared ATAC-Seq peaks in black.

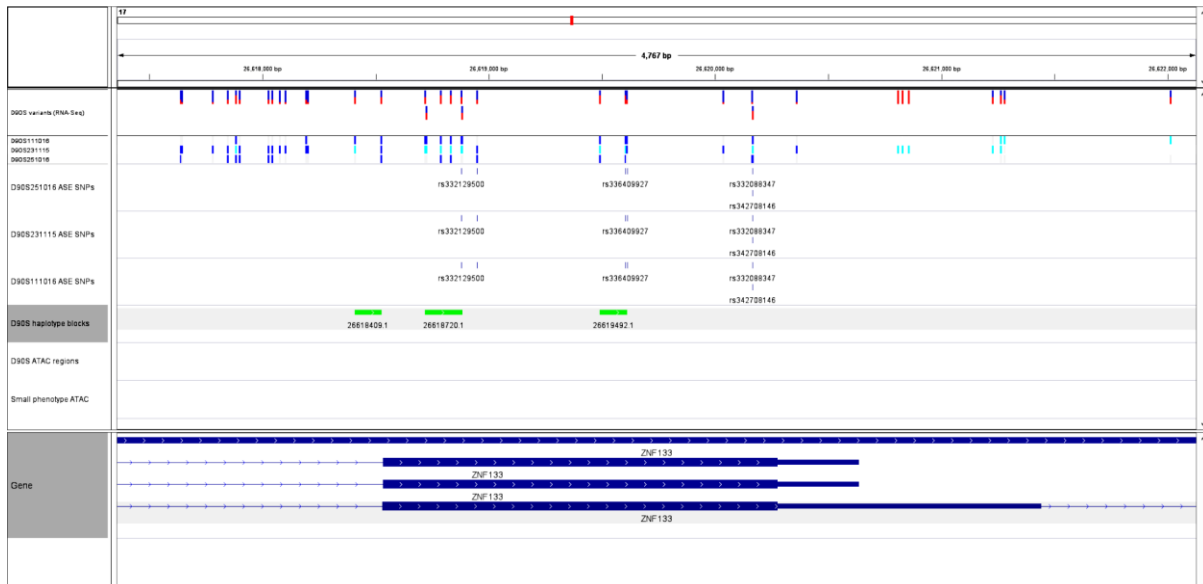

1526

1527 Supplementary Figure S11: Genomic track visualisation of the genomic region including gene  
1528 *ZNF133*. Variants called using RNA-Seq data with read-backed haplotype blocks in the small  
1529 sized piglets, and the corresponding open chromatin regions (ATAC-Seq peaks), are shown.  
1530 The top four tracks show variants in dark blue (one consensus genotype track and three ASE  
1531 positive variants in each piglet) and the haplotype block in green. ATAC-Seq peaks specific to  
1532 small sized piglets are shown in pink and shared ATAC-Seq peaks in black.
